# Supplementary material
Source: PubMed Central journal article supplement (PMC4270388)
Supplement: es504102z_si_001.pdf [file es504102z_si_001.pdf]

## Supplemental Material

### Polycyclic Aromatic Hydrocarbon exposure and household solid fuel combustion in Xuanwei and Fuyuan counties, China

George S. Downward<sup>1†</sup>, Wei Hu<sup>2</sup>, Nat Rothman<sup>2</sup>, Boris Reiss<sup>1</sup>, Guoping Wu<sup>3</sup>, Fusheng Wei<sup>3</sup>, Robert S. Chapman<sup>4</sup>, Lutzen Portengen<sup>1</sup>, Lan Qing<sup>2\*</sup>, Roel Vermeulen<sup>1\*</sup>

<sup>1</sup>Institute for Risk Assessment Sciences, Division of Environmental Epidemiology, Utrecht University, Utrecht, The Netherlands

<sup>2</sup>Division of Cancer Epidemiology and Genetics, National Cancer Institute, NIH, DHHS, Bethesda, MD, USA

<sup>3</sup>China National Environmental Monitoring Centre, Beijing, China

<sup>4</sup>College of Public Health Sciences, Chulalongkorn University, Bangkok, Thailand

†: Corresponding author

Correspondence:

George Downward

Institute for Risk Assessment Sciences,

Utrecht University,

Utrecht,

Yalelaan 2

3584CM

The Netherlands

Phone: +31 30 253 2578

Email: [g.s.downward@uu.nl](mailto:g.s.downward@uu.nl)

\*: These authors co-supervised this work.

## Table of Contents

|                                                                                                                               |    |
|-------------------------------------------------------------------------------------------------------------------------------|----|
| Table S1 – Variables considered for inclusion in linear mixed models .....                                                    | 3  |
| Table S2 – Personal exposure to particle bound PAHs by fuel type and ventilation .....                                        | 4  |
| Table S3 – Personal exposure to gas phase PAHs by fuel type and ventilation .....                                             | 6  |
| Table S4 – Personal exposure to particle phase PAHs by smoky coal source.....                                                 | 7  |
| Table S5 – Personal exposure to gas phase PAHs by smoky coal source .....                                                     | 8  |
| Table S6 – Indoor measurements of particle phase PAHs by fuel type and ventilation .....                                      | 9  |
| Table S7 – Indoor measurements of particle phase PAHs by smoky coal source .....                                              | 11 |
| Table S8 – Exploratory factor analysis of log transformed indoor PAH values .....                                             | 12 |
| Table S9 – Mixed effect model for indoor PAH measurements (using PAHs and variables selected for personal measurements) ..... | 13 |
| Table S10 – Mixed effect models for personal exposure to particle bound PAHs .....                                            | 14 |
| Table S11 – Mixed effect models for personal exposure to gas-phase PAHs .....                                                 | 16 |
| Table S12 – Mixed effect models for indoor measurements of particle bound PAHs .....                                          | 17 |
| Table S13 – Total PAH values and BaP <sub>eq</sub> values by fuel type and stove design .....                                 | 19 |
| Table S14 – Total PAH values and BaP <sub>eq</sub> values by smoky coal source .....                                          | 20 |
| Table S15 – Mixed effect models for total PAH values and BAP <sub>eq</sub> values .....                                       | 21 |

**Table S1 - Variables considered for inclusion in mixed model creation**

| Broad Category            | Details                                                                                                                                                                                                                                                                                                                                                                                      |
|---------------------------|----------------------------------------------------------------------------------------------------------------------------------------------------------------------------------------------------------------------------------------------------------------------------------------------------------------------------------------------------------------------------------------------|
| Stove Design              | <p><b>Stove ventilated, unventilated mixed portable stove or firepit</b></p> <p>Stove ventilated, unventilated or mixed ventilation<sup>*</sup></p> <p>Stove ventilated, unventilated mixed or firepit</p> <p>Stove either firepit or other design (or mixed)</p> <p>Stove design as reported by study participant<sup>£</sup></p>                                                           |
| Fuel Type/Source          | <p><b>Major fuel type including smoky coal subtypes and county from which coal sourced (Xuanwei divided into north/south)</b></p> <p>County from which fuel purchased</p> <p>Major fuel type</p> <p>Fuel type including smoky coal subtypes</p> <p>Fuel type including individual smoky coal mines</p> <p>Fuel type including smoky coal subtypes</p> <p>Weight of fuel used<sup>†</sup></p> |
| Meteorological conditions | <p><b>Season of visit</b></p> <p>Average daily temperature</p> <p>Average daily high temperature</p> <p>Average daily low temperature</p> <p>Average daily humidity</p> <p>Average daily wind speed</p> <p>Average daily maximum wind speed</p> <p>Average daily dew point</p> <p>Average daily rainfall</p>                                                                                 |
| Other Variables           | <p><b>Room size<sup>†</sup></b></p> <p>Age of participant</p> <p>Month of visit</p> <p>Phase of study during visit</p> <p>Administrative borders<sup>‡</sup></p> <p>Number of stoves operated</p> <p>Number of hours spent using stove(s)</p>                                                                                                                                                |

\* - refers to the use of multiple stoves with different ventilation designs

£ - Categories are high stove, low stove (with or without ventilation), portable stove, firepit and multiple stoves

† - divided into quartiles

‡ - townships/areas as defined by local administrative bodies

Variables in bold were selected in the final model

**Table S2a - Personal exposure to particle bound PAHs (in ng/m<sup>3</sup>) by ventilation**

|                       | N          | BaP         |              |            | PYR          |              |            | BbF          |              |            | DBA         |             |            | BaA          |              |            | BkF         |             |            |
|-----------------------|------------|-------------|--------------|------------|--------------|--------------|------------|--------------|--------------|------------|-------------|-------------|------------|--------------|--------------|------------|-------------|-------------|------------|
|                       |            | AM          | GM           | GSD        | AM           | GM           | GSD        | AM           | GM           | GSD        | AM          | GM          | GSD        | AM           | GM           | GSD        | AM          | GM          | GSD        |
| <b>Smoky Coal</b>     | <b>131</b> | <b>74.4</b> | <b>44.7</b>  | <b>2.8</b> | <b>71.8</b>  | <b>22.6</b>  | <b>4.6</b> | <b>119.6</b> | <b>69.8</b>  | <b>2.8</b> | <b>27.8</b> | <b>13.8</b> | <b>3.4</b> | <b>102.4</b> | <b>49.0</b>  | <b>3.5</b> | <b>26.5</b> | <b>15.7</b> | <b>2.8</b> |
| Ventilated Stove      | 72         | 50.2        | 38.1         | 2.1        | 33.1         | 18.2         | 3.2        | 75.5         | 56.9         | 2.2        | 16.8        | 10.6        | 2.7        | 61.1         | 40.9         | 2.6        | 18.9        | 13.9        | 2.2        |
| Unventilated Stove    | 6          | 224.5       | 160.3        | 2.4        | 290.3        | 131.5        | 4.4        | 406.7        | 269.4        | 2.7        | 92.1        | 54.2        | 3.1        | 357.5        | 205.9        | 3.3        | 78.1        | 45.8        | 3.2        |
| Portable Stove        | 13         | 41.5        | 31.5         | 2.2        | 22.4         | 10.4         | 3.9        | 88.5         | 66.6         | 2.2        | 17.5        | 11.4        | 2.6        | 56.2         | 35.4         | 2.8        | 13.9        | 9.7         | 2.4        |
| Firepit               | 11         | 186.4       | 151.5†       | 2.0        | 247.7        | 164.5†       | 2.6        | 302.6        | 243.6†       | 2.0        | 76.5        | 61.4†       | 1.9        | 282.6        | 216.3†       | 2.1        | 62.5        | 50.4†       | 1.9        |
| Mixed Ventilation     | 25         | 85.7        | 48.1         | 3.2        | 90.4         | 26.7         | 5.0        | 129.2        | 71.6         | 3.2        | 31.7        | 15.6        | 3.9        | 119.7        | 52.7         | 4.2        | 30.3        | 17.5        | 3.0        |
| Unknown               | 4          | 13.2        | 7.7          | 3.0        | 2.0          | 1.5          | 2.2        | 19.7         | 11.4         | 3.0        | 5.0         | 2.7         | 3.2        | 9.3          | 4.5          | 3.6        | 5.4         | 2.9         | 3.2        |
| <b>Smokeless Coal</b> | <b>27</b>  | <b>15.1</b> | <b>10.6*</b> | <b>2.5</b> | <b>6.8</b>   | <b>3.1*</b>  | <b>3.5</b> | <b>50.4</b>  | <b>28.6*</b> | <b>2.9</b> | <b>8.8</b>  | <b>5.1*</b> | <b>2.9</b> | <b>13.3</b>  | <b>7.5*</b>  | <b>3.2</b> | <b>11.9</b> | <b>4.4*</b> | <b>3.0</b> |
| Ventilated Stove      | 2          | 5.6         | 5.5          | 1.3        | 3.8          | 2.5          | 4.2        | 12.4         | 12.4         | 1.1        | 8.2         | 4.8         | 4.9        | 5.4          | 3.7          | 3.8        | 1.8         | 1.8         | 1.2        |
| Unventilated Stove    | 14         | 13.8        | 9.4*         | 2.7        | 2.7          | 1.7*         | 2.5        | 33.1         | 22.9*        | 2.7        | 7.2         | 4.6*        | 2.7        | 9.4          | 5.4*         | 3.0        | 4.9         | 3.6*        | 2.3        |
| Portable Stove        | 10         | 19.3        | 14.2         | 2.4        | 13.4         | 6.9          | 3.8        | 85.1         | 47.8         | 3.3        | 11.9        | 6.7         | 3.3        | 20.6         | 13.4         | 3.1        | 24.4        | 7.0         | 4.2        |
| Firepit               | 0          | -           | -            | -          | -            | -            | -          | -            | -            | -          | -           | -           | -          | -            | -            | -          | -           | -           | -          |
| Mixed Ventilation     | 1          | 10.6        | 10.6         | -          | 4.2          | 4.2          | -          | 20.1         | 20.1         | -          | 1.5         | 1.5         | -          | 10.6         | 10.6         | -          | 4.2         | 4.2         | -          |
| Unknown               | 0          | -           | -            | -          | -            | -            | -          | -            | -            | -          | -           | -           | -          | -            | -            | -          | -           | -           | -          |
| <b>“Other” Coal</b>   | <b>24</b>  | <b>61.5</b> | <b>39.7</b>  | <b>2.8</b> | <b>54.7</b>  | <b>20.1</b>  | <b>5.4</b> | <b>103.9</b> | <b>63.1</b>  | <b>3.0</b> | <b>26.0</b> | <b>13.2</b> | <b>3.4</b> | <b>82.7</b>  | <b>43.4</b>  | <b>3.7</b> | <b>21.4</b> | <b>13.8</b> | <b>2.9</b> |
| Ventilated Stove      | 10         | 38.8        | 26.9         | 2.6        | 29.2         | 10.1         | 5.2        | 53.3         | 36.9         | 2.6        | 10.3        | 7.4         | 2.6        | 41.8         | 24.2         | 3.3        | 12.8        | 8.8         | 2.7        |
| Unventilated Stove    | 0          | -           | -            | -          | -            | -            | -          | -            | -            | -          | -           | -           | -          | -            | -            | -          | -           | -           | -          |
| Portable Stove        | 9          | 95.6        | 68.0         | 2.8        | 83.8         | 41.0         | 4.8        | 175.2        | 118.1        | 3.1        | 50.5        | 34.4        | 2.7        | 142.6        | 91.2         | 3.4        | 33.2        | 23.1        | 2.9        |
| Firepit               | 1          | 21.8        | 21.8         | -          | 4.4          | 4.4          | -          | 34.8         | 34.8         | -          | 5.4         | 5.4         | -          | 8.7          | 8.7          | -          | 9.8         | 9.8         | -          |
| Mixed Ventilation     | 4          | 51.7        | 36.4         | 3.2        | 65.5         | 33.7         | 5.2        | 87.4         | 68.3         | 2.6        | 15.4        | 8.0         | 3.8        | 68.6         | 52.5         | 2.7        | 19.1        | 14.5        | 2.7        |
| Unknown               | 0          | -           | -            | -          | -            | -            | -          | -            | -            | -          | -           | -           | -          | -            | -            | -          | -           | -           | -          |
| <b>Wood</b>           | <b>14</b>  | <b>66.6</b> | <b>58.2</b>  | <b>1.7</b> | <b>85.1</b>  | <b>44.8</b>  | <b>3.6</b> | <b>91.2</b>  | <b>80.4</b>  | <b>1.7</b> | <b>14.2</b> | <b>10.3</b> | <b>2.6</b> | <b>74.2</b>  | <b>62.5</b>  | <b>1.9</b> | <b>24.5</b> | <b>20.6</b> | <b>1.8</b> |
| Ventilated Stove      | 5          | 73.4        | 61.2         | 1.9        | 83.2         | 24.7         | 5.8        | 106.3        | 91.8         | 1.9        | 20.9        | 18.3        | 1.8        | 75.5         | 57.4         | 2.4        | 29.3        | 24.7        | 1.9        |
| Unventilated Stove    | 0          | -           | -            | -          | -            | -            | -          | -            | -            | -          | -           | -           | -          | -            | -            | -          | -           | -           | -          |
| Portable Stove        | 4          | 78.4        | 70.1         | 1.7        | 57.1         | 47.5         | 2.3        | 103.8        | 93.5         | 1.7        | 14.1        | 11.3        | 2.1        | 89.8         | 77.8         | 1.8        | 27.8        | 23.6        | 1.9        |
| Firepit               | 5          | 50.2        | 47.7         | 1.4        | 109.5        | 77.4         | 2.8        | 65.9         | 62.4         | 1.5        | 7.8         | 5.3*        | 2.9        | 60.5         | 57.0         | 1.5        | 17.0        | 15.3        | 1.7        |
| Mixed Ventilation     | 0          | -           | -            | -          | -            | -            | -          | -            | -            | -          | -           | -           | -          | -            | -            | -          | -           | -           | -          |
| Unknown               | 0          | -           | -            | -          | -            | -            | -          | -            | -            | -          | -           | -           | -          | -            | -            | -          | -           | -           | -          |
| <b>Plant</b>          | <b>4</b>   | <b>95.6</b> | <b>83.8</b>  | <b>1.9</b> | <b>157.2</b> | <b>130.0</b> | <b>2.1</b> | <b>146.6</b> | <b>131.5</b> | <b>1.8</b> | <b>20.5</b> | <b>13.9</b> | <b>3.7</b> | <b>129.6</b> | <b>114.4</b> | <b>1.8</b> | <b>37.1</b> | <b>29.2</b> | <b>2.3</b> |
| Ventilated Stove      | 0          | -           | -            | -          | -            | -            | -          | -            | -            | -          | -           | -           | -          | -            | -            | -          | -           | -           | -          |
| Unventilated Stove    | 1          | 116.1       | 116.1        | -          | 191.1        | 191.1        | -          | 177.0        | 177.0        | -          | 23.5        | 23.5        | -          | 170.0        | 170.0        | -          | 39.9        | 39.9        | -          |
| Portable Stove        | 1          | 39.5        | 39.5         | -          | 109.0        | 109.0        | -          | 59.8         | 59.8         | -          | 2.0         | 2.0         | -          | 56.6         | 56.6         | -          | 9.6         | 9.6         | -          |
| Firepit               | 1          | 67.3        | 67.3         | -          | 49.1         | 49.1         | -          | 126.6        | 126.6        | -          | 29.7        | 29.7        | -          | 86.7         | 86.7         | -          | 26.2        | 26.2        | -          |
| Mixed Ventilation     | 1          | 159.5       | 159.5        | -          | 279.7        | 279.7        | -          | 222.7        | 222.7        | -          | 26.9        | 26.9        | -          | 205.1        | 205.1        | -          | 72.5        | 72.5        | -          |
| Unknown               | 0          | -           | -            | -          | -            | -            | -          | -            | -            | -          | -           | -           | -          | -            | -            | -          | -           | -           | -          |
| <b>“Other” Fuel</b>   | <b>66</b>  | <b>73.8</b> | <b>36.9</b>  | <b>3.3</b> | <b>92.7</b>  | <b>21.0</b>  | <b>6.3</b> | <b>119.1</b> | <b>62.2</b>  | <b>3.3</b> | <b>25.7</b> | <b>10.2</b> | <b>3.9</b> | <b>101.0</b> | <b>37.6</b>  | <b>4.4</b> | <b>25.8</b> | <b>13.5</b> | <b>3.2</b> |
| Ventilated Stove      | 12         | 37.5        | 26.5         | 2.6        | 35.4         | 10.1         | 5.2        | 51.8         | 35.3         | 2.7        | 10.5        | 7.2         | 2.9        | 42.1         | 21.4         | 3.9        | 11.8        | 8.5         | 2.7        |
| Unventilated Stove    | 13         | 158.8       | 73.0         | 4.7        | 224.5        | 52.3         | 10.2       | 272.7        | 145.5        | 4.1        | 71.1        | 30.6        | 4.4        | 230.7        | 89.3         | 6.0        | 55.4        | 28.3        | 4.2        |
| Portable Stove        | 6          | 62.0        | 40.9         | 2.9        | 49.6         | 21.4         | 5.2        | 104.8        | 78.4         | 2.5        | 19.8        | 10.7        | 3.7        | 80.8         | 41.9         | 3.9        | 19.0        | 13.0        | 2.7        |
| Firepit               | 0          | -           | -            | -          | -            | -            | -          | -            | -            | -          | -           | -           | -          | -            | -            | -          | -           | -           | -          |
| Mixed Ventilation     | 32         | 60.0        | 33.5         | 3.0        | 75.9         | 21.2         | 5.3        | 93.0         | 56.5         | 2.9        | 15.8        | 7.9         | 3.4        | 81.8         | 35.4         | 3.8        | 22.0        | 13.1        | 2.8        |
| Unknown               | 3          | 21.3        | 16.5         | 2.5        | 15.4         | 7.0          | 5.5        | 30.8         | 26.1         | 2.0        | 6.8         | 4.7         | 2.9        | 19.2         | 13.2         | 3.2        | 7.4         | 5.4         | 2.7        |

\*- significant difference with smoky coal for same PAH and strata via Tukey HSD test

† - significant difference with ventilated stove for same PAH within fuel strata via Tukey HSD test

N – number of samples

BaP - benzo[a]pyrene, PYR - pyrene, BbF - benzo[b]fluoranthene DBA - dibenz(ah)anthracene, BaA - benzo[a]anthracene, BkF - benzo[k]fluoranthene

**Table S2b - Personal Exposure to particle bound PAHs (in ng/m<sup>3</sup>) by ventilation**

|                       | N          | BPE         |                    |            | CHR          |                    |            | FLT          |                    |            | IPY         |                   |            |
|-----------------------|------------|-------------|--------------------|------------|--------------|--------------------|------------|--------------|--------------------|------------|-------------|-------------------|------------|
|                       |            | AM          | GM                 | GSD        | AM           | GM                 | GSD        | AM           | GM                 | GSD        | AM          | GM                | GSD        |
| <b>Smoky Coal</b>     | <b>131</b> | <b>81.5</b> | <b>47.1</b>        | <b>3.0</b> | <b>94.3</b>  | <b>44.0</b>        | <b>3.6</b> | <b>65.3</b>  | <b>19.3</b>        | <b>4.7</b> | <b>45.7</b> | <b>28.3</b>       | <b>2.8</b> |
| Ventilated Stove      | 72         | 53.7        | 39.1               | 2.2        | 54.3         | 34.5               | 2.8        | 28.7         | 15.6               | 3.3        | 33.6        | 25.4              | 2.1        |
| Unventilated Stove    | 6          | 230.2       | 165.1              | 2.5        | 374.8        | 217.3              | 3.2        | 273.6        | 108.2              | 5.1        | 112.4       | 71.8              | 2.8        |
| Portable Stove        | 13         | 48.0        | 33.1               | 2.8        | 68.7         | 45.0               | 2.7        | 17.2         | 9.2                | 3.2        | 23.6        | 17.0              | 2.3        |
| Firepit               | 11         | 220.7       | 185.3 <sup>†</sup> | 1.9        | 245.2        | 186.4 <sup>†</sup> | 2.1        | 228.7        | 147.6 <sup>†</sup> | 2.7        | 109.5       | 92.9 <sup>†</sup> | 1.8        |
| Mixed Ventilation     | 25         | 92.4        | 51.8               | 3.5        | 103.0        | 45.5               | 4.1        | 84.1         | 21.9               | 5.4        | 52.9        | 31.0              | 3.3        |
| Unknown               | 4          | 17.6        | 8.4                | 3.6        | 7.9          | 4.4                | 3.2        | 1.6          | 1.4                | 1.8        | 12.8        | 5.6               | 4.0        |
| <b>Smokeless Coal</b> | <b>27</b>  | <b>17.6</b> | <b>11.1*</b>       | <b>2.9</b> | <b>29.3</b>  | <b>12.6*</b>       | <b>3.5</b> | <b>5.6</b>   | <b>2.8*</b>        | <b>3.2</b> | <b>13.7</b> | <b>9.7*</b>       | <b>2.5</b> |
| Ventilated Stove      | 2          | 7.2         | 4.9                | 3.8        | 7.0          | 4.8                | 3.8        | 3.9          | 2.7                | 3.7        | 8.8         | 7.4               | 2.4        |
| Unventilated Stove    | 14         | 15.8        | 9.9*               | 2.9        | 12.6         | 8.3*               | 2.6        | 2.4          | 1.7*               | 2.2        | 12.5        | 8.7*              | 2.6        |
| Portable Stove        | 10         | 23.1        | 15.1               | 3.0        | 58.7         | 27.3               | 4.0        | 10.7         | 5.4                | 3.9        | 17.1        | 12.4              | 2.5        |
| Firepit               | 0          | -           | -                  | -          | -            | -                  | -          | -            | -                  | -          | -           | -                 | -          |
| Mixed Ventilation     | 1          | 10.6        | 10.6               | -          | 13.7         | 13.7               | -          | 4.2          | 4.2                | -          | 6.3         | 6.3               | -          |
| Unknown               | 0          | -           | -                  | -          | -            | -                  | -          | -            | -                  | -          | -           | -                 | -          |
| <b>“Other” Coal</b>   | <b>24</b>  | <b>69.3</b> | <b>41.9</b>        | <b>2.9</b> | <b>89.1</b>  | <b>43.2</b>        | <b>3.9</b> | <b>44.0</b>  | <b>15.6</b>        | <b>5.5</b> | <b>40.3</b> | <b>26.4</b>       | <b>2.7</b> |
| Ventilated Stove      | 10         | 36.5        | 27.4               | 2.3        | 39.1         | 21.9               | 3.4        | 23.7         | 8.4                | 4.8        | 22.7        | 17.8              | 2.2        |
| Unventilated Stove    | 0          | -           | -                  | -          | -            | -                  | -          | -            | -                  | -          | -           | -                 | -          |
| Portable Stove        | 9          | 118.4       | 80.7               | 2.8        | 159.4        | 91.1               | 3.8        | 65.1         | 31.1               | 5.2        | 64.2        | 47.4              | 2.4        |
| Firepit               | 1          | 23.9        | 23.9               | -          | 7.6          | 7.6                | -          | 3.3          | 3.3                | -          | 17.4        | 17.4              | -          |
| Mixed Ventilation     | 4          | 52.4        | 31.7               | 3.4        | 76.2         | 67.4               | 1.8        | 57.4         | 23.7               | 7.6        | 36.2        | 20.9              | 3.9        |
| Unknown               | 0          | -           | -                  | -          | -            | -                  | -          | -            | -                  | -          | -           | -                 | -          |
| <b>Wood</b>           | <b>14</b>  | <b>55.2</b> | <b>44.2</b>        | <b>2.0</b> | <b>66.2</b>  | <b>54.3</b>        | <b>2.0</b> | <b>73.7</b>  | <b>34.7</b>        | <b>4.0</b> | <b>59.7</b> | <b>47.2</b>       | <b>2.0</b> |
| Ventilated Stove      | 5          | 70.9        | 60.6               | 1.9        | 73.3         | 51.6               | 2.9        | 73.5         | 19.1               | 6.2        | 66.9        | 50.8              | 2.2        |
| Unventilated Stove    | 0          | -           | -                  | -          | -            | -                  | -          | -            | -                  | -          | -           | -                 | -          |
| Portable Stove        | 4          | 60.2        | 48.4               | 2.1        | 72.2         | 60.0               | 2.0        | 41.2         | 33.5               | 2.4        | 71.0        | 57.5              | 2.0        |
| Firepit               | 5          | 35.5        | 30.1               | 1.9        | 54.4         | 52.7               | 1.3        | 99.8         | 64.8               | 3.2        | 43.4        | 37.4              | 1.9        |
| Mixed Ventilation     | 0          | -           | -                  | -          | -            | -                  | -          | -            | -                  | -          | -           | -                 | -          |
| Unknown               | 0          | -           | -                  | -          | -            | -                  | -          | -            | -                  | -          | -           | -                 | -          |
| <b>Plant</b>          | <b>4</b>   | <b>73.7</b> | <b>62.1</b>        | <b>2.2</b> | <b>128.7</b> | <b>121.5</b>       | <b>1.5</b> | <b>144.8</b> | <b>118.5</b>       | <b>2.2</b> | <b>58.8</b> | <b>49.3</b>       | <b>2.0</b> |
| Ventilated Stove      | 0          | -           | -                  | -          | -            | -                  | -          | -            | -                  | -          | -           | -                 | -          |
| Unventilated Stove    | 1          | 93.8        | 93.8               | -          | 171.2        | 171.2              | -          | 170.0        | 170.0              | -          | 69.2        | 69.2              | -          |
| Portable Stove        | 1          | 19.2        | 19.2               | -          | 91.9         | 91.9               | -          | 104.7        | 104.7              | -          | 20.3        | 20.3              | -          |
| Firepit               | 1          | 94.7        | 94.7               | -          | 81.0         | 81.0               | -          | 42.2         | 42.2               | -          | 39.9        | 39.9              | -          |
| Mixed Ventilation     | 1          | 87.0        | 87.0               | -          | 170.9        | 170.9              | -          | 262.1        | 262.1              | -          | 105.7       | 105.7             | -          |
| Unknown               | 0          | -           | -                  | -          | -            | -                  | -          | -            | -                  | -          | -           | -                 | -          |
| <b>“Other” Fuel</b>   | <b>66</b>  | <b>80.1</b> | <b>34.7</b>        | <b>3.6</b> | <b>96.3</b>  | <b>37.3</b>        | <b>4.3</b> | <b>82.6</b>  | <b>17.4</b>        | <b>6.6</b> | <b>43.5</b> | <b>26.2</b>       | <b>2.7</b> |
| Ventilated Stove      | 12         | 45.4        | 27.6               | 3.1        | 33.6         | 17.8               | 3.5        | 32.4         | 8.6                | 5.5        | 25.3        | 20.1              | 2.2        |
| Unventilated Stove    | 13         | 200.5       | 77.2               | 5.3        | 242.5        | 102.3              | 5.5        | 197.2        | 42.9               | 10.7       | 90.8        | 50.4              | 3.6        |
| Portable Stove        | 6          | 88.9        | 45.7               | 3.8        | 81.6         | 49.1               | 3.2        | 37.8         | 17.6               | 4.9        | 34.6        | 24.2              | 2.5        |
| Firepit               | 0          | -           | -                  | -          | -            | -                  | -          | -            | -                  | -          | -           | -                 | -          |
| Mixed Ventilation     | 32         | 48.3        | 27.6               | 3.1        | 70.8         | 35.5               | 3.5        | 70.0         | 17.4               | 5.6        | 34.9        | 23.0              | 2.6        |
| Unknown               | 3          | 18.3        | 18.0               | 1.3        | 15.7         | 8.7                | 4.2        | 12.0         | 5.4                | 5.4        | 20.8        | 20.4              | 1.3        |

\*- significant difference with smoky coal for same PAH and strata via Tukey HSD test

† - significant difference with ventilated stove for same PAH within fuel strata via Tukey HSD test

N – number of samples

BPE - benzo[ghi]perylene, CHR – chrysene, FLT - fluoranthene, IPY - indeno(1,2,3-cd)pyrene.

**Table S3 - Personal Exposure to Gas phase PAHs (in ng/m<sup>3</sup>) by ventilation**

|                       | N  | NAP   |        |      | ANY   |       |      | FLU  |       |     | PHE  |       |     |
|-----------------------|----|-------|--------|------|-------|-------|------|------|-------|-----|------|-------|-----|
|                       |    | AM    | GM     | GSD  | AM    | GM    | GSD  | AM   | GM    | GSD | AM   | GM    | GSD |
| <b>Smoky Coal</b>     | 96 | 4200  | 2900   | 2.4  | 700   | 450   | 2.7  | 430  | 260   | 2.7 | 620  | 360   | 2.8 |
| Vented Stove          | 53 | 2900  | 2500   | 1.9  | 510   | 400   | 2.1  | 260  | 200   | 2.1 | 350  | 260   | 2.1 |
| Unvented Stove        | 4  | 11000 | 6300   | 3.0  | 960   | 710   | 2.4  | 920  | 660   | 2.7 | 1300 | 820   | 3.3 |
| Portable Stove        | 12 | 4900  | 3900   | 2.1  | 750   | 510   | 2.5  | 530  | 430   | 1.9 | 970  | 770   | 2.0 |
| Firepit               | 4  | 17000 | 14000  | 2.1  | 3000  | 2600  | 1.8  | 2200 | 1800+ | 2.1 | 3200 | 2300+ | 2.3 |
| Mixed Ventilation     | 19 | 3900  | 2600   | 3.2  | 750   | 460   | 3.5  | 420  | 250   | 3.3 | 560  | 340   | 3.4 |
| Unknown               | 4  | 1300  | 1100   | 2.0  | 200   | 150   | 2.2  | 110  | 82    | 2.2 | 190  | 140   | 2.3 |
| <b>Smokeless Coal</b> | 17 | 3100  | 2800   | 1.6  | 470   | 370   | 2.1  | 210  | 200   | 1.5 | 420  | 370   | 1.7 |
| Vented Stove          | 0  | -     | -      | -    | -     | -     | -    | -    | -     | -   | -    | -     | -   |
| Unvented Stove        | 9  | 2800  | 2600   | 1.6  | 480   | 380   | 2.2  | 180  | 160   | 1.6 | 340  | 310   | 1.6 |
| Portable Stove        | 7  | 3600  | 3400   | 1.5  | 490   | 370   | 2.3  | 260  | 260   | 1.2 | 530  | 480   | 1.7 |
| Firepit               | 0  | -     | -      | -    | -     | -     | -    | -    | -     | -   | -    | -     | -   |
| Mixed Ventilation     | 1  | 2000  | 2000   | -    | 310   | 310   | -    | 190  | 190   | -   | 260  | 260   | -   |
| Unknown               | 0  | -     | -      | -    | -     | -     | -    | -    | -     | -   | -    | -     | -   |
| <b>“Other” Coal</b>   | 14 | 8300  | 5400   | 2.8  | 950   | 590   | 3.0  | 610  | 360   | 3.4 | 1000 | 570   | 3.5 |
| Vented Stove          | 6  | 3200  | 2500   | 2.3  | 450   | 310   | 2.8  | 190  | 130   | 2.7 | 320  | 220   | 2.8 |
| Unvented Stove        | 0  | -     | -      | -    | -     | -     | -    | -    | -     | -   | -    | -     | -   |
| Portable Stove        | 7  | 13000 | 11000  | 2.1  | 1400  | 1000  | 2.7  | 1000 | 800   | 2.2 | 1600 | 1300  | 2.5 |
| Firepit               | 0  | -     | -      | -    | -     | -     | -    | -    | -     | -   | -    | -     | -   |
| Mixed Ventilation     | 1  | 5900  | 5900   | -    | 630   | 630   | -    | 450  | 450   | -   | 670  | 670   | -   |
| Unknown               | 0  | -     | -      | -    | -     | -     | -    | -    | -     | -   | -    | -     | -   |
| <b>Wood</b>           | 7  | 14000 | 5900   | 6.4  | 3300  | 1600* | 6.0  | 730  | 380   | 5.0 | 1100 | 600   | 4.9 |
| Vented Stove          | 2  | 13000 | 13000  | 1.3  | 3200  | 3200  | 1.1  | 730  | 730   | 1.2 | 1100 | 1100  | 1.3 |
| Unvented Stove        | 0  | -     | -      | -    | -     | -     | -    | -    | -     | -   | -    | -     | -   |
| Portable Stove        | 3  | 21000 | 14000  | 3.1  | 5200  | 3800  | 2.7  | 1100 | 850   | 2.5 | 1700 | 1300  | 2.5 |
| Firepit               | 2  | 2000  | 730    | 10.9 | 570   | 200   | 11.1 | 150  | 62    | 8.5 | 240  | 100   | 8.3 |
| Mixed Ventilation     | 0  | -     | -      | -    | -     | -     | -    | -    | -     | -   | -    | -     | -   |
| Unknown               | 0  | -     | -      | -    | -     | -     | -    | -    | -     | -   | -    | -     | -   |
| <b>Plant</b>          | 3  | 26000 | 20000* | 2.4  | 6400  | 5700* | 1.8  | 1400 | 1300* | 1.6 | 2500 | 2500* | 1.3 |
| Vented Stove          | 0  | -     | -      | -    | -     | -     | -    | -    | -     | -   | -    | -     | -   |
| Unvented Stove        | 1  | 54000 | 54000  | -    | 11000 | 11000 | -    | 2200 | 2200  | -   | 3300 | 3300  | -   |
| Portable Stove        | 0  | -     | -      | -    | -     | -     | -    | -    | -     | -   | -    | -     | -   |
| Firepit               | 1  | 10000 | 10000  | -    | 3600  | 3600  | -    | 1100 | 1100  | -   | 2300 | 2300  | -   |
| Mixed Ventilation     | 1  | 15000 | 15000  | -    | 4500  | 4500  | -    | 960  | 960   | -   | 2000 | 2000  | -   |
| Unknown               | 0  | -     | -      | -    | -     | -     | -    | -    | -     | -   | -    | -     | -   |
| <b>“Other” Fuel</b>   | 56 | 7600  | 4300   | 3.1  | 1300  | 730*  | 3.4  | 600  | 300   | 3.4 | 1000 | 500   | 3.6 |
| Vented Stove          | 9  | 4500  | 3100   | 2.4  | 860   | 600   | 2.5  | 310  | 220   | 2.4 | 460  | 330   | 2.4 |
| Unvented Stove        | 11 | 20000 | 13000  | 3.4  | 3100  | 2100  | 3.4  | 1700 | 1100  | 3.5 | 2900 | 1800+ | 3.6 |
| Portable Stove        | 5  | 4400  | 4000   | 1.6  | 820   | 700   | 1.9  | 410  | 340   | 1.9 | 780  | 630   | 2.1 |
| Firepit               | 0  | -     | -      | -    | -     | -     | -    | -    | -     | -   | -    | -     | -   |
| Mixed Ventilation     | 28 | 4500  | 3300   | 2.7  | 910   | 550   | 3.4  | 320  | 220   | 2.8 | 570  | 360   | 3.1 |
| Unknown               | 3  | 4400  | 2500   | 3.7  | 1100  | 450   | 5.8  | 280  | 140   | 4.3 | 510  | 240   | 4.6 |

\* - significant difference with smoky coal for same PAH and strata via Tukey HSD test

† - significant difference with vented stove for same PAH within fuel strata via Tukey HSD test

N – number of samples

NAP - naphthalene, ANY – acenaphthylene, FLU – fluorine, PHE - phenanthrene

**Table S4 - Personal exposure to particle phase PAHs (in ng/m<sup>3</sup>) by smoky coal source**

| County                         | Smoky coal subtype | Mine Name             | N         | BaP   |       |        | FLT   |       |       | PYR   |       |       | BbF   |       |       | DBA   |       |       | BaA   |       |        | BkF   |       |       | BPE   |       |       |     |  |
|--------------------------------|--------------------|-----------------------|-----------|-------|-------|--------|-------|-------|-------|-------|-------|-------|-------|-------|-------|-------|-------|-------|-------|-------|--------|-------|-------|-------|-------|-------|-------|-----|--|
|                                |                    |                       |           | AM    | GM    | GSD    | AM    | GM    | GSD   | AM    | GM    | GSD   | AM    | GM    | GSD   | AM    | GM    | GSD   | AM    | GM    | GSD    | AM    | GM    | GSD   | AM    | GM    | GSD   |     |  |
| <b>Xuanwei</b>                 | <b>Coking Coal</b> |                       | <b>74</b> | 72.4  | 47.5  | 2.6    | 56.7  | 19.9  | 4.4   | 63.5  | 24.7  | 4.1   | 106.4 | 69.7  | 2.6   | 27.1  | 15.5  | 3.1   | 95.5  | 53.5  | 3.3    | 26.0  | 16.9  | 2.6   | 79.2  | 50.1  | 2.8   |     |  |
|                                |                    | Azhi                  | 21        | 86.6  | 58.4  | 2.7    | 66.7  | 24.5  | 4.2   | 72.4  | 30.1  | 3.7   | 132.2 | 92.3  | 2.5   | 31.7  | 20.3  | 2.9   | 116.9 | 73.0  | 3.0    | 32.9  | 22.6  | 2.5   | 94.6  | 66.6  | 2.6   |     |  |
|                                |                    | Baoshan               | 8         | 103.9 | 63.6  | 3.6    | 96.2  | 31.1  | 8.4   | 110.3 | 39.4  | 7.0   | 160.8 | 101.1 | 3.5   | 47.2  | 24.2  | 4.2   | 142.0 | 71.2  | 5.3    | 33.0  | 21.6  | 3.2   | 126.3 | 71.0  | 4.0   |     |  |
|                                |                    | Laibin                | 20        | 57.0  | 44.6  | 2.1    | 29.7  | 16.7  | 3.5   | 39.0  | 21.9  | 3.2   | 79.3  | 60.9  | 2.3   | 23.5  | 14.9  | 2.8   | 69.5  | 46.1  | 3.0    | 18.4  | 14.2  | 2.2   | 67.5  | 46.7  | 2.8   |     |  |
|                                |                    | Tangtang              | 16        | 81.2  | 47.0  | 3.1    | 82.0  | 21.3  | 6.3   | 86.2  | 26.0  | 6.0   | 114.5 | 66.3  | 3.0   | 24.1  | 12.6  | 3.3   | 113.4 | 55.3  | 3.8    | 30.5  | 17.0  | 3.2   | 77.2  | 43.6  | 3.1   |     |  |
|                                |                    | Yangchang             | 9         | 30.0  | 26.5  | 1.7    | 13.1  | 10.9  | 2.0   | 15.0  | 12.4  | 2.0   | 43.8  | 38.2  | 1.8   | 11.9  | 8.9   | 2.5   | 30.3  | 26.1  | 1.8    | 12.4  | 10.2  | 2.0   | 30.8  | 28.5  | 1.6   |     |  |
|                                |                    | <b>Fuyuan Overall</b> | <b>52</b> | 76.7  | 39.2* | 3.0    | 80.9  | 18.3* | 5.4   | 86.2  | 19.5* | 5.7   | 136.5 | 65.8* | 3.2   | 28.6  | 10.9* | 3.9   | 114.3 | 42.1* | 4.1    | 28.0  | 14.0* | 3.1   | 83.2  | 40.9* | 3.3   |     |  |
|                                |                    | <b>Coking Coal</b>    |           | 17    | 152.8 | 81.4†  | 3.3   | 199.3 | 45.8† | 8.4   | 212.4 | 55.4† | 7.6   | 280.4 | 155†  | 3.1   | 65.1  | 34.8† | 3.2   | 252.3 | 115.4† | 3.9   | 55.0  | 27.8† | 3.5   | 163.2 | 83.9† | 3.8 |  |
|                                |                    |                       | Daping    | 6     | 29.5  | 24.9   | 1.9   | 10.1  | 4.6   | 3.5   | 13.9  | 6.5   | 3.7   | 59.5  | 51.9  | 1.8   | 11.9  | 11.0  | 1.6   | 35.2  | 29.0   | 2.0   | 10.0  | 8.4   | 1.9   | 33.8  | 30.6  | 1.6 |  |
| Enhong                         | 7                  |                       | 118.9     | 99.6  | 1.9   | 134.3  | 89.7  | 2.6   | 150.4 | 102.2 | 2.6   | 210.3 | 179.8 | 1.8   | 45.8  | 39.3  | 1.9   | 184.9 | 149.6 | 2.0   | 39.6   | 32.3  | 2.1   | 135.3 | 87.3  | 3.9   |       |     |  |
| Haidan                         | 4                  |                       | 397.1     | 338.8 | 2.1   | 596.7  | 436.8 | 3.1   | 618.8 | 475.3 | 2.7   | 734.4 | 617.4 | 2.2   | 178.6 | 157.7 | 1.9   | 695.7 | 581.8 | 2.2   | 149.7  | 127.7 | 2.1   | 406.3 | 354.6 | 2.0   |       |     |  |
| <b>1/3 Coking Coal</b>         |                    |                       | 8         | 42.0  | 27.7† | 2.9    | 36.5  | 17.1† | 4.8   | 37.1  | 15.3† | 5.5   | 98.6  | 60.7† | 3.5   | 18.6  | 10.2† | 3.7   | 66.5  | 34.7† | 4.5    | 16.7  | 10.7† | 3.2   | 48.6  | 31.4† | 3.0   |     |  |
|                                | Bagong             |                       | 6         | 53.3  | 43.3  | 2.2    | 47.9  | 35.2  | 2.4   | 49.1  | 34.5  | 2.6   | 127.1 | 107.7 | 1.9   | 24.0  | 17.2  | 2.8   | 87.1  | 70.9  | 2.1    | 21.4  | 18.0  | 2.0   | 61.4  | 48.5  | 2.2   |     |  |
|                                | Dahe               |                       | 2         | 7.9   | 7.2   | 1.8    | 2.2   | 1.9   | 2.2   | 1.4   | 1.4   | 1.3   | 12.9  | 10.8  | 2.4   | 2.4   | 2.2   | 1.8   | 5.0   | 4.1   | 2.5    | 2.4   | 2.2   | 1.8   | 10.1  | 8.5   | 2.3   |     |  |
| <b>Gas Fat Coal</b>            |                    |                       | 25        | 37.5  | 27.1  | 2.2    | 19.8  | 10.9  | 2.9   | 21.0  | 11.0  | 3.2   | 51.1  | 37.0  | 2.2   | 7.4   | 4.9   | 2.4   | 37.4  | 23.0  | 2.7    | 13.9  | 10.0  | 2.2   | 41.5  | 29.3  | 2.3   |     |  |
|                                | Housuo             |                       | 24        | 37.4  | 26.7  | 2.2    | 20.0  | 10.7  | 2.9   | 21.1  | 10.8  | 3.3   | 50.8  | 36.3  | 2.2   | 7.4   | 4.8   | 2.4   | 37.5  | 22.6  | 2.7    | 14.1  | 10.0  | 2.3   | 40.8  | 28.5  | 2.3   |     |  |
|                                | Qingyun            | 1                     | 39.9      | 39.9  | -     | 15.7   | 15.7  | -     | 18.1  | 18.1  | -     | 56.9  | 56.9  | -     | 8.5   | 8.5   | -     | 35.1  | 35.1  | -     | 9.7    | 9.7   | -     | 58.1  | 58.1  | -     |       |     |  |
| <b>Meager Lean Coal (Gumu)</b> |                    | 2                     | 59.0      | 32.0  | 5.6   | 16.1   | 6.9   | 8.3   | 25.5  | 8.5   | 12.1  | 132.3 | 83.3  | 4.3   | 24.0  | 14.3  | 4.8   | 95.2  | 33.0  | 11.4  | 18.5   | 8.8   | 7.0   | 63.4  | 17.4  | 16.2  |       |     |  |
|                                |                    | N                     |           | CHR   |       | IPY    |       |       |       |       |       |       |       |       |       |       |       |       |       |       |        |       |       |       |       |       |       |     |  |
| <b>Xuanwei</b>                 | <b>Coking Coal</b> |                       | <b>74</b> | 82.3  | 46.5  | 3.2    | 46.9  | 30.0  | 2.8   |       |       |       |       |       |       |       |       |       |       |       |        |       |       |       |       |       |       |     |  |
|                                |                    | Azhi                  | 21        | 102.4 | 65.2  | 3.0    | 54.6  | 37.7  | 2.6   |       |       |       |       |       |       |       |       |       |       |       |        |       |       |       |       |       |       |     |  |
|                                |                    | Baoshan               | 8         | 122.6 | 67.6  | 4.1    | 69.8  | 39.6  | 4.0   |       |       |       |       |       |       |       |       |       |       |       |        |       |       |       |       |       |       |     |  |
|                                |                    | Laibin                | 20        | 61.0  | 41.1  | 2.9    | 36.6  | 26.3  | 2.5   |       |       |       |       |       |       |       |       |       |       |       |        |       |       |       |       |       |       |     |  |
|                                |                    | TangTang              | 16        | 95.4  | 45.9  | 4.0    | 50.7  | 28.5  | 3.0   |       |       |       |       |       |       |       |       |       |       |       |        |       |       |       |       |       |       |     |  |
|                                |                    | Yangchang             | 9         | 23.8  | 20.6  | 1.8    | 24.5  | 19.9  | 2.2   |       |       |       |       |       |       |       |       |       |       |       |        |       |       |       |       |       |       |     |  |
|                                |                    | <b>Fuyuan Overall</b> | <b>52</b> | 111.5 | 38.0* | 4.4    | 44.6  | 25.6* | 2.8   |       |       |       |       |       |       |       |       |       |       |       |        |       |       |       |       |       |       |     |  |
|                                |                    | <b>Coking Coal</b>    |           | 17    | 248.5 | 114.6† | 3.9   | 83.1  | 50.2† | 3.0   |       |       |       |       |       |       |       |       |       |       |        |       |       |       |       |       |       |     |  |
|                                |                    |                       | Daping    | 6     | 40.4  | 31.3   | 2.4   | 18.7  | 16.5  | 1.8   |       |       |       |       |       |       |       |       |       |       |        |       |       |       |       |       |       |     |  |
| Enhong                         | 7                  |                       | 176.9     | 139.2 | 2.1   | 69.9   | 62.4  | 1.7   |       |       |       |       |       |       |       |       |       |       |       |       |        |       |       |       |       |       |       |     |  |
| Haidan                         | 4                  |                       | 686.0     | 572.2 | 2.2   | 203.1  | 183.0 | 1.8   |       |       |       |       |       |       |       |       |       |       |       |       |        |       |       |       |       |       |       |     |  |
| <b>1/3 Coking Coal</b>         |                    |                       | 8         | 87.2  | 45.5† | 4.9    | 25.3  | 16.5† | 2.9   |       |       |       |       |       |       |       |       |       |       |       |        |       |       |       |       |       |       |     |  |
|                                | Bagong             |                       | 6         | 114.3 | 98.3  | 1.9    | 32.2  | 25.7  | 2.3   |       |       |       |       |       |       |       |       |       |       |       |        |       |       |       |       |       |       |     |  |
|                                | Dahe               |                       | 2         | 6.0   | 4.5   | 3.1    | 4.5   | 4.4   | 1.4   |       |       |       |       |       |       |       |       |       |       |       |        |       |       |       |       |       |       |     |  |
| <b>Gas Fat Coal</b>            |                    |                       | 25        | 25.3  | 16.6  | 2.6    | 26.1  | 19.3  | 2.2   |       |       |       |       |       |       |       |       |       |       |       |        |       |       |       |       |       |       |     |  |
|                                | Housuo             |                       | 24        | 25.1  | 16.3  | 2.6    | 25.7  | 18.8  | 2.2   |       |       |       |       |       |       |       |       |       |       |       |        |       |       |       |       |       |       |     |  |
|                                | Qingyun            | 1                     | 29.0      | 29.0  | -     | 35.1   | 35.1  | -     |       |       |       |       |       |       |       |       |       |       |       |       |        |       |       |       |       |       |       |     |  |
| <b>Meager Lean Coal (Gumu)</b> | 2                  | 123.3                 | 47.3      | 9.8   | 25.6  | 16.4   | 4.2   |       |       |       |       |       |       |       |       |       |       |       |       |       |        |       |       |       |       |       |       |     |  |

\*- significant difference between smoky coal subtypes from Fuyuan

† - significant variation within designated smoky coal subtype

N – number of samples

BaP - benzo[a]pyrene, PYR - pyrene, BbF - benzo[b]fluoranthene DBA - dibenz(ah)anthracene, BaA - benzo[a]anthracene, BkF - benzo[k]fluoranthene

BPE - benzo[ghi]perylene, CHR – chrysene, FLT - fluoranthene, IPY - indeno(1,2,3-cd)pyrene

**Table S5 - Personal Exposure to Gas Phase PAHs (in ng/m<sup>3</sup>) by Smoky Coal Source**

| County         | Smoky coal subtype | Mine Name              | N         | NAP   |       |     | ANY  |      |     | FLU  |      |     | PHE  |       |     |
|----------------|--------------------|------------------------|-----------|-------|-------|-----|------|------|-----|------|------|-----|------|-------|-----|
|                |                    |                        |           | AM    | GM    | GSD | AM   | GM   | GSD | AM   | GM   | GSD | AM   | GM    | GSD |
| <b>Xuanwei</b> | <b>Coking Coal</b> |                        | <b>61</b> | 3600  | 2700  | 2.4 | 590  | 400  | 2.6 | 340  | 230  | 2.6 | 460  | 310   | 2.7 |
|                |                    | Azhi                   | 19        | 3300  | 2700  | 2.0 | 560  | 420  | 2.3 | 330  | 250  | 2.3 | 440  | 320   | 2.5 |
|                |                    | Baoshan                | 7         | 6100  | 4200  | 2.5 | 900  | 580  | 2.9 | 520  | 290  | 3.3 | 730  | 420   | 3.4 |
|                |                    | Laibin                 | 19        | 2700  | 2100  | 2.7 | 380  | 290  | 2.7 | 250  | 190  | 2.7 | 340  | 260   | 2.7 |
|                |                    | TangTang               | 16        | 4100  | 3000  | 2.3 | 740  | 490  | 2.6 | 390  | 240  | 2.7 | 520  | 320   | 2.7 |
| <b>Fuyuan</b>  | <b>Overall</b>     |                        | <b>30</b> | 5100  | 2900  | 2.7 | 930  | 530  | 3.0 | 560  | 290* | 2.9 | 850  | 420*  | 3.1 |
|                |                    | Coking Coal            | 5         | 15000 | 7100† | 5.0 | 2300 | 960† | 6.0 | 1700 | 820† | 4.3 | 2600 | 1400† | 3.8 |
|                |                    | Daping                 | 2         | 1300  | 1300  | 1.2 | 140  | 140  | 1.1 | 190  | 190  | 1.1 | 370  | 370   | 1.1 |
|                |                    | Haidan                 | 3         | 25000 | 22000 | 1.9 | 3800 | 3400 | 1.7 | 2700 | 2200 | 2.2 | 4200 | 3400  | 2.2 |
|                |                    | 1/3 Coking Coal (Dahe) | 2         | 2300  | 1800  | 2.6 | 370  | 320  | 2.2 | 310  | 230  | 3.3 | 480  | 390   | 2.7 |
|                |                    | Gas Fat Coal (Housuo)  | 21        | 2900  | 2400  | 2.1 | 680  | 500  | 2.5 | 310  | 230  | 2.4 | 390  | 290   | 2.3 |
|                |                    | Meager Lean Coal(Gumu) | 2         | 5500  | 4400  | 2.6 | 580  | 440  | 3.1 | 640  | 460  | 3.3 | 1600 | 1200  | 2.9 |

\*- significant difference between smoky coal subtypes from Fuyuan

† - significant variation within designated smoky coal subtype

N – number of samples

NAP - naphthalene, ANY – acenaphthylene, FLU – fluorine, PHE - phenanthrene



**Table S6a – Indoor measurements of particle phase PAHs (in ng/m<sup>3</sup>) by fuel type and stove design**

|                       | N          | BaP          |              |            | PYR          |              |            | BbF          |              |            | DBA         |             |            | BaA          |             |            | BkF         |             |            |
|-----------------------|------------|--------------|--------------|------------|--------------|--------------|------------|--------------|--------------|------------|-------------|-------------|------------|--------------|-------------|------------|-------------|-------------|------------|
|                       |            | AM           | GM           | GSD        | AM           | GM           | GSD        | AM           | GM           | GSD        | AM          | GM          | GSD        | AM           | GM          | GSD        | AM          | GM          | GSD        |
| <b>Smoky Coal</b>     | <b>137</b> | <b>73.5</b>  | <b>47.6</b>  | <b>2.5</b> | <b>76.0</b>  | <b>26.6</b>  | <b>4.4</b> | <b>115.2</b> | <b>72.0</b>  | <b>2.7</b> | <b>31.2</b> | <b>16.9</b> | <b>3.1</b> | <b>97.0</b>  | <b>53.0</b> | <b>3.2</b> | <b>26.6</b> | <b>17.0</b> | <b>2.6</b> |
| Ventilated Stove      | 75         | 52.6         | 39.3         | 2.1        | 40.6         | 19.5         | 3.2        | 78.5         | 57.0         | 2.3        | 19.9        | 12.8        | 2.7        | 65.6         | 42.1        | 2.7        | 20.4        | 14.2        | 2.3        |
| Unventilated Stove    | 6          | 110.0        | 75.4         | 2.5        | 147.2        | 62.6         | 4.4        | 194.0        | 131.4        | 2.5        | 60.7        | 40.7        | 2.9        | 164.6        | 101.1       | 2.8        | 37.4        | 23.5        | 2.8        |
| Portable Stove        | 13         | 66.7         | 45.0         | 2.6        | 58.2         | 23.7         | 4.7        | 145.6        | 86.2         | 2.9        | 29.6        | 16.7        | 3.1        | 92.2         | 49.5        | 3.6        | 23.4        | 15.2        | 2.6        |
| Firepit               | 12         | 164.1        | 150.4†       | 1.6        | 242.8        | 203.0†       | 1.9        | 272.9        | 247.4†       | 1.6        | 80.3        | 60.8†       | 2.5        | 243.4        | 219.6†      | 1.6        | 59.5        | 53.2†       | 1.7        |
| Mixed Ventilation     | 27         | 95.4         | 56.6         | 2.6        | 103.8        | 34.1         | 4.5        | 129.7        | 82.7         | 2.5        | 37.3        | 19.6        | 2.8        | 119.5        | 66.4        | 2.9        | 31.5        | 21.3        | 2.5        |
| Unknown               | 4          | 12.2         | 9.8          | 2.2        | 1.7          | 1.6          | 1.6        | 15.6         | 12.4         | 2.1        | 13.3        | 7.0         | 4.1        | 7.9          | 5.6         | 2.6        | 4.4         | 3.1         | 2.5        |
| <b>Smokeless Coal</b> | <b>25</b>  | <b>15.3</b>  | <b>10.4*</b> | <b>2.7</b> | <b>4.3</b>   | <b>2.1*</b>  | <b>3.1</b> | <b>49.8</b>  | <b>34.9*</b> | <b>2.6</b> | <b>12.2</b> | <b>6.9*</b> | <b>3.1</b> | <b>12.4</b>  | <b>7.3*</b> | <b>3.0</b> | <b>6.2</b>  | <b>4.7*</b> | <b>2.2</b> |
| Ventilated Stove      | 2          | 2.0          | 2.0*         | 1.2        | 0.7          | 0.6          | 1.4        | 26.5         | 19.6         | 3.2        | 17.6        | 5.7         | 12.7       | 1.2          | 1.2*        | 1.3        | 1.7         | 1.7         | 1.2        |
| Unventilated Stove    | 13         | 18.6         | 12.8         | 2.7        | 5.1          | 2.3*         | 3.2        | 53.9         | 37.9         | 2.6        | 11.0        | 7.3         | 2.8        | 14.9         | 9.4*        | 2.8        | 7.0         | 5.4         | 2.3        |
| Portable Stove        | 9          | 12.6         | 10.2         | 2.2        | 3.4          | 2.0          | 3.0        | 50.7         | 35.2         | 2.8        | 13.4        | 6.5         | 3.2        | 10.1         | 6.7         | 2.7        | 5.6         | 4.5         | 2.1        |
| Firepit               | 0          | -            | -            | -          | -            | -            | -          | -            | -            | -          | -           | -           | -          | -            | -           | -          | -           | -           | -          |
| Mixed Ventilation     | 1          | 23.5         | 23.5         | -          | 9.1          | 9.1          | -          | 34.4         | 34.4         | -          | 7.2         | 7.2         | -          | 23.5         | 23.5        | -          | 10.0        | 10.0        | -          |
| Unknown               | 0          | -            | -            | -          | -            | -            | -          | -            | -            | -          | -           | -           | -          | -            | -           | -          | -           | -           | -          |
| <b>“Other” Coal</b>   | <b>26</b>  | <b>46.2</b>  | <b>35.0</b>  | <b>2.2</b> | <b>45.5</b>  | <b>19.9</b>  | <b>3.8</b> | <b>73.2</b>  | <b>54.1</b>  | <b>2.3</b> | <b>19.6</b> | <b>12.6</b> | <b>2.8</b> | <b>56.1</b>  | <b>38.1</b> | <b>2.5</b> | <b>16.6</b> | <b>11.8</b> | <b>2.5</b> |
| Ventilated Stove      | 10         | 41.5         | 33.6         | 2.1        | 21.5         | 14.3         | 3.1        | 52.8         | 42.6         | 2.1        | 24.2        | 14.2        | 3.2        | 42.8         | 30.7        | 2.4        | 15.1        | 10.8        | 2.6        |
| Unventilated Stove    | 0          | -            | -            | -          | -            | -            | -          | -            | -            | -          | -           | -           | -          | -            | -           | -          | -           | -           | -          |
| Portable Stove        | 9          | 53.6         | 35.7         | 2.7        | 79.8         | 30.1         | 5.0        | 86.9         | 60.0         | 2.6        | 17.3        | 10.5        | 3.1        | 72.2         | 42.8        | 3.2        | 18.8        | 11.9        | 2.9        |
| Firepit               | 1          | 44.0         | 44.0         | -          | 14.7         | 14.7         | -          | 127.2        | 127.2        | -          | 24.5        | 24.5        | -          | 59.7         | 59.7        | -          | 16.6        | 16.6        | -          |
| Mixed Ventilation     | 6          | 43.2         | 34.8         | 2.1        | 39.3         | 19.3         | 3.8        | 77.5         | 59.8         | 2.3        | 14.6        | 12.0        | 2.1        | 53.6         | 42.4        | 2.2        | 15.8        | 12.5        | 2.2        |
| Unknown               | 0          | -            | -            | -          | -            | -            | -          | -            | -            | -          | -           | -           | -          | -            | -           | -          | -           | -           | -          |
| <b>Wood</b>           | <b>14</b>  | <b>55.2</b>  | <b>47.9</b>  | <b>1.7</b> | <b>98.3</b>  | <b>63.0</b>  | <b>3.2</b> | <b>73.2</b>  | <b>64.2</b>  | <b>1.7</b> | <b>6.6</b>  | <b>5.7*</b> | <b>1.8</b> | <b>61.9</b>  | <b>51.0</b> | <b>2.0</b> | <b>21.8</b> | <b>18.6</b> | <b>1.8</b> |
| Ventilated Stove      | 5          | 67.6         | 54.3         | 2.1        | 109.4        | 48.8         | 6.0        | 87.5         | 71.8         | 2.1        | 7.1         | 6.8         | 1.4        | 67.8         | 47.4        | 2.8        | 27.5        | 22.2        | 2.1        |
| Unventilated Stove    | 0          | -            | -            | -          | -            | -            | -          | -            | -            | -          | -           | -           | -          | -            | -           | -          | -           | -           | -          |
| Portable Stove        | 3          | 45.9         | 42.4         | 1.6        | 45.1         | 38.4         | 2.0        | 60.4         | 56.5         | 1.6        | 7.8         | 5.8         | 2.5        | 55.0         | 47.9        | 1.9        | 19.1        | 17.4        | 1.7        |
| Firepit               | 5          | 48.0         | 43.8         | 1.7        | 119.7        | 100.4        | 1.9        | 65.6         | 59.6         | 1.7        | 5.6         | 4.8*        | 2.0        | 59.1         | 54.0        | 1.6        | 17.9        | 15.9        | 1.8        |
| Mixed Ventilation     | 0          | -            | -            | -          | -            | -            | -          | -            | -            | -          | -           | -           | -          | -            | -           | -          | -           | -           | -          |
| Unknown               | 1          | 57.6         | 57.6         | -          | 96.1         | 96.1         | -          | 77.9         | 77.9         | -          | 5.1         | 5.1         | -          | 66.7         | 66.7        | -          | 21.2        | 21.2        | -          |
| <b>Plant</b>          | <b>5</b>   | <b>69.2</b>  | <b>65.1</b>  | <b>1.5</b> | <b>164.6</b> | <b>145.2</b> | <b>1.7</b> | <b>100.8</b> | <b>94.7</b>  | <b>1.5</b> | <b>12.4</b> | <b>8.6</b>  | <b>2.9</b> | <b>90.8</b>  | <b>85.1</b> | <b>1.5</b> | <b>34.0</b> | <b>28.6</b> | <b>1.9</b> |
| Ventilated Stove      | 0          | -            | -            | -          | -            | -            | -          | -            | -            | -          | -           | -           | -          | -            | -           | -          | -           | -           | -          |
| Unventilated Stove    | 1          | 47.6         | 47.6         | -          | 90.7         | 90.7         | -          | 71.9         | 71.9         | -          | 24.4        | 24.4        | -          | 68.6         | 68.6        | -          | 64.2        | 64.2        | -          |
| Portable Stove        | 1          | 59.3         | 59.3         | -          | 191.4        | 191.4        | -          | 88.4         | 88.4         | -          | 2.0         | 2.0         | -          | 83.9         | 83.9        | -          | 15.7        | 15.7        | -          |
| Firepit               | 2          | 61.0         | 59.6         | 1.4        | 112.8        | 108.6        | 1.5        | 92.2         | 86.7         | 1.7        | 13.3        | 10.4        | 2.9        | 70.2         | 69.4        | 1.3        | 20.6        | 19.7        | 1.5        |
| Mixed Ventilation     | 1          | 116.9        | 116.9        | -          | 315.4        | 315.4        | -          | 159.2        | 159.2        | -          | 8.8         | 8.8         | -          | 161.2        | 161.2       | -          | 49.1        | 49.1        | -          |
| Unknown               | 0          | -            | -            | -          | -            | -            | -          | -            | -            | -          | -           | -           | -          | -            | -           | -          | -           | -           | -          |
| <b>“Other” Fuel</b>   | <b>75</b>  | <b>100.1</b> | <b>37.4</b>  | <b>3.8</b> | <b>161.0</b> | <b>21.1</b>  | <b>8.0</b> | <b>163.8</b> | <b>64.2</b>  | <b>3.6</b> | <b>40.0</b> | <b>13.4</b> | <b>3.9</b> | <b>142.0</b> | <b>36.1</b> | <b>5.0</b> | <b>36.4</b> | <b>14.6</b> | <b>3.6</b> |
| Ventilated Stove      | 14         | 44.3         | 27.8         | 2.9        | 85.8         | 17.0         | 6.6        | 58.2         | 34.3         | 3.2        | 14.1        | 11.5        | 2.1        | 51.6         | 23.4        | 4.3        | 17.4        | 10.7        | 3.3        |
| Unventilated Stove    | 21         | 174.9        | 62.5         | 5.3        | 322.4        | 47.8         | 12.0       | 314.6        | 126.1        | 4.6        | 77.1        | 22.3        | 5.8        | 258.2        | 72.0        | 6.9        | 65.4        | 26.6        | 4.8        |
| Portable Stove        | 6          | 50.4         | 41.6         | 2.1        | 38.2         | 18.8         | 4.9        | 95.9         | 82.2         | 1.9        | 31.5        | 23.5        | 2.4        | 58.1         | 38.9        | 3.0        | 15.7        | 13.4        | 1.9        |
| Firepit               | 0          | -            | -            | -          | -            | -            | -          | -            | -            | -          | -           | -           | -          | -            | -           | -          | -           | -           | -          |
| Mixed Ventilation     | 31         | 91.3         | 32.0         | 3.5        | 122.2        | 15.5         | 6.4        | 135.0        | 57.5         | 2.9        | 31.8        | 10.8        | 3.4        | 131.9        | 30.5        | 4.3        | 31.9        | 12.7        | 3.1        |
| Unknown               | 3          | 25.5         | 17.0         | 3.1        | 28.9         | 5.7          | 10.2       | 33.8         | 20.3         | 3.5        | 2.6         | 2.3         | 1.9        | 21.6         | 10.6        | 4.2        | 8.8         | 5.0         | 3.7        |

\*- significant difference with smoky coal for same PAH and strata via Tukey HSD test

† - significant difference with ventilated stove for same PAH within fuel strata via Tukey HSD test

N – number of samples

BaP - benzo[a]pyrene, PYR - pyrene, BbF - benzo[b]fluoranthene DBA - dibenz[ah]anthracene, BaA - benzo[a]anthracene, BkF - benzo[k]fluoranthene

**Table S6b - Indoor measurements of particle phase PAHs (in ng/m3) by fuel type and stove design**

|                       | N          | BPE          |                    |            | CHR          |                    |            | FLT          |                    |            | IPY         |                   |            |
|-----------------------|------------|--------------|--------------------|------------|--------------|--------------------|------------|--------------|--------------------|------------|-------------|-------------------|------------|
|                       |            | AM           | GM                 | GSD        | AM           | GM                 | GSD        | AM           | GM                 | GSD        | AM          | GM                | GSD        |
| <b>Smoky Coal</b>     | <b>137</b> | <b>92.6</b>  | <b>53.5</b>        | <b>2.7</b> | <b>91.2</b>  | <b>47.3</b>        | <b>3.3</b> | <b>65.2</b>  | <b>22.0</b>        | <b>4.6</b> | <b>47.7</b> | <b>31.8</b>       | <b>2.5</b> |
| Ventilated Stove      | 75         | 58.3         | 42.6               | 2.3        | 55.2         | 35.4               | 2.7        | 36.2         | 16.8               | 3.3        | 36.9        | 27.2              | 2.2        |
| Unventilated Stove    | 6          | 148.5        | 108.0              | 2.4        | 176.2        | 108.6              | 2.7        | 128.9        | 50.0               | 4.6        | 73.1        | 51.5              | 2.6        |
| Portable Stove        | 13         | 82.1         | 51.6               | 2.8        | 111.8        | 59.3               | 3.6        | 48.8         | 19.0               | 4.9        | 31.3        | 23.1              | 2.3        |
| Firepit               | 12         | 211.4        | 177.7 <sup>†</sup> | 1.9        | 251.7        | 207.8 <sup>†</sup> | 1.9        | 217.8        | 178.3 <sup>†</sup> | 2.0        | 108.7       | 94.4 <sup>†</sup> | 1.8        |
| Mixed Ventilation     | 27         | 138.8        | 62.6               | 2.8        | 103.4        | 55.5               | 2.9        | 81.3         | 26.0               | 4.9        | 57.5        | 37.1              | 2.4        |
| Unknown               | 4          | 19.5         | 13.8               | 2.9        | 8.6          | 5.9                | 2.9        | 1.0          | 1.0                | 1.2        | 16.2        | 10.6              | 3.5        |
| <b>Smokeless Coal</b> | <b>25</b>  | <b>21.7</b>  | <b>13.9*</b>       | <b>2.8</b> | <b>25.6</b>  | <b>15.1*</b>       | <b>3.2</b> | <b>3.5</b>   | <b>1.9*</b>        | <b>2.8</b> | <b>15.5</b> | <b>11.4*</b>      | <b>2.4</b> |
| Ventilated Stove      | 2          | 14.7         | 6.7                | 7.5        | 19.1         | 7.2                | 10.0       | 0.9          | 0.8                | 1.4        | 15.5        | 7.2               | 7.2        |
| Unventilated Stove    | 13         | 23.4         | 14.9               | 2.7        | 24.2         | 15.3               | 2.9        | 4.0          | 1.9*               | 3.0        | 15.8        | 12.5              | 2.1        |
| Portable Stove        | 9          | 20.8         | 14.1               | 2.7        | 29.9         | 16.8               | 3.4        | 2.9          | 1.9                | 2.7        | 15.3        | 10.7              | 2.4        |
| Firepit               | 0          | -            | -                  | -          | -            | -                  | -          | -            | -                  | -          | -           | -                 | -          |
| Mixed Ventilation     | 1          | 21.7         | 21.7               | -          | 19.0         | 19.0               | -          | 7.2          | 7.2                | -          | 14.5        | 14.5              | -          |
| Unknown               | 0          | -            | -                  | -          | -            | -                  | -          | -            | -                  | -          | -           | -                 | -          |
| <b>“Other” Coal</b>   | <b>26</b>  | <b>51.9</b>  | <b>37.1</b>        | <b>2.4</b> | <b>55.8</b>  | <b>36.7</b>        | <b>2.6</b> | <b>38.5</b>  | <b>16.0</b>        | <b>3.9</b> | <b>32.6</b> | <b>24.2</b>       | <b>2.3</b> |
| Ventilated Stove      | 10         | 48.2         | 37.3               | 2.3        | 36.6         | 26.1               | 2.4        | 16.3         | 11.1               | 3.0        | 36.1        | 28.7              | 2.2        |
| Unventilated Stove    | 0          | -            | -                  | -          | -            | -                  | -          | -            | -                  | -          | -           | -                 | -          |
| Portable Stove        | 9          | 61.9         | 37.7               | 3.0        | 70.9         | 45.1               | 2.9        | 68.5         | 25.2               | 5.0        | 32.6        | 20.3              | 2.9        |
| Firepit               | 1          | 64.6         | 64.6               | -          | 152.7        | 152.7              | -          | 12.7         | 12.7               | -          | 26.4        | 26.4              | -          |
| Mixed Ventilation     | 6          | 41.1         | 32.8               | 2.2        | 49.1         | 37.5               | 2.4        | 34.8         | 15.4               | 4.5        | 27.9        | 23.7              | 2.0        |
| Unknown               | 0          | -            | -                  | -          | -            | -                  | -          | -            | -                  | -          | -           | -                 | -          |
| <b>Wood</b>           | <b>14</b>  | <b>33.2</b>  | <b>29.4</b>        | <b>1.7</b> | <b>52.6</b>  | <b>42.4</b>        | <b>2.1</b> | <b>86.7</b>  | <b>48.6</b>        | <b>4.0</b> | <b>37.4</b> | <b>32.6</b>       | <b>1.7</b> |
| Ventilated Stove      | 5          | 42.4         | 36.1               | 1.9        | 52.0         | 35.7               | 2.8        | 96.9         | 33.2               | 8.2        | 45.9        | 38.1              | 2.1        |
| Unventilated Stove    | 0          | -            | -                  | -          | -            | -                  | -          | -            | -                  | -          | -           | -                 | -          |
| Portable Stove        | 3          | 27.1         | 25.5               | 1.5        | 45.0         | 38.6               | 2.0        | 33.6         | 28.0               | 2.2        | 33.8        | 30.6              | 1.7        |
| Firepit               | 5          | 28.0         | 25.7               | 1.6        | 56.8         | 50.1               | 1.8        | 109.0        | 88.5               | 2.0        | 31.7        | 28.6              | 1.7        |
| Mixed Ventilation     | 0          | -            | -                  | -          | -            | -                  | -          | -            | -                  | -          | -           | -                 | -          |
| Unknown               | 1          | 31.4         | 31.4               | -          | 57.6         | 57.6               | -          | 83.9         | 83.9               | -          | 34.4        | 34.4              | -          |
| <b>Plant</b>          | <b>5</b>   | <b>44.3</b>  | <b>41.1</b>        | <b>1.5</b> | <b>88.3</b>  | <b>85.0</b>        | <b>1.4</b> | <b>159.5</b> | <b>137.6</b>       | <b>1.8</b> | <b>39.9</b> | <b>38.0</b>       | <b>1.4</b> |
| Ventilated Stove      | 0          | -            | -                  | -          | -            | -                  | -          | -            | -                  | -          | -           | -                 | -          |
| Unventilated Stove    | 1          | 43.2         | 43.2               | -          | 68.6         | 68.6               | -          | 85.2         | 85.2               | -          | 35.4        | 35.4              | -          |
| Portable Stove        | 1          | 24.6         | 24.6               | -          | 92.9         | 92.9               | -          | 185.8        | 185.8              | -          | 26.9        | 26.9              | -          |
| Firepit               | 2          | 51.4         | 46.6               | 1.9        | 75.7         | 73.5               | 1.4        | 104.6        | 99.0               | 1.6        | 37.1        | 36.4              | 1.3        |
| Mixed Ventilation     | 1          | 51.1         | 51.1               | -          | 128.7        | 128.7              | -          | 317.4        | 317.4              | -          | 62.9        | 62.9              | -          |
| Unknown               | 0          | -            | -                  | -          | -            | -                  | -          | -            | -                  | -          | -           | -                 | -          |
| <b>“Other” Fuel</b>   | <b>75</b>  | <b>106.7</b> | <b>39.2</b>        | <b>3.7</b> | <b>149.0</b> | <b>38.6</b>        | <b>4.8</b> | <b>143.8</b> | <b>17.7</b>        | <b>8.1</b> | <b>63.5</b> | <b>29.0</b>       | <b>3.2</b> |
| Ventilated Stove      | 14         | 41.2         | 30.3               | 2.4        | 42.0         | 18.2               | 4.3        | 87.9         | 14.1               | 7.6        | 34.0        | 26.6              | 2.0        |
| Unventilated Stove    | 21         | 208.8        | 63.7               | 5.7        | 262.8        | 82.7               | 5.9        | 280.3        | 40.0               | 12.2       | 109.7       | 47.1              | 4.4        |
| Portable Stove        | 6          | 95.4         | 67.7               | 2.7        | 54.3         | 40.2               | 2.6        | 31.0         | 17.0               | 4.3        | 40.4        | 33.6              | 2.0        |
| Firepit               | 0          | -            | -                  | -          | -            | -                  | -          | -            | -                  | -          | -           | -                 | -          |
| Mixed Ventilation     | 31         | 78.1         | 32.1               | 3.1        | 151.1        | 38.3               | 3.7        | 110.1        | 13.0               | 6.4        | 54.5        | 22.7              | 3.1        |
| Unknown               | 3          | 16.5         | 11.5               | 2.8        | 19.0         | 6.3                | 6.6        | 24.1         | 4.9                | 10.0       | 17.6        | 13.3              | 2.4        |

\*- significant difference with smoky coal for same PAH and strata via Tukey HSD test

† - significant difference with ventilated stove for same PAH within fuel strata via Tukey HSD test

N – number of samples

BPE - benzo[ghi]perylene, CHR – chrysene, FLT - fluoranthene, IPY - indeno(1,2,3-cd)pyrene.

**Table S7 - Indoor measurements of particle phase PAHs (in ng/m<sup>3</sup>) by smoky coal source**

| County                         | Smoky coal subtype | Mine Name                 | N         | BaP         |              |            | FLT         |              |            | PYR         |              |            | BbF          |              |            | DBA         |              |            | BaA         |              |            | BkF         |              |            | BPE         |              |            |     |
|--------------------------------|--------------------|---------------------------|-----------|-------------|--------------|------------|-------------|--------------|------------|-------------|--------------|------------|--------------|--------------|------------|-------------|--------------|------------|-------------|--------------|------------|-------------|--------------|------------|-------------|--------------|------------|-----|
|                                |                    |                           |           | AM          | GM           | GSD        | AM          | GM           | GSD        | AM          | GM           | GSD        | AM           | GM           | GSD        | AM          | GM           | GSD        | AM          | GM           | GSD        | AM          | GM           | GSD        | AM          | GM           | GSD        |     |
| <b>Xuanwei</b>                 | <b>Coking Coal</b> |                           | 77        | 79.1        | 50.0         | 2.5        | 66.3        | 20.9         | 4.8        | 79.3        | 26.7         | 4.4        | 111.0        | 70.8         | 2.7        | 32.0        | 17.6         | 3.0        | 101.6       | 57.1         | 3.0        | 27.4        | 17.6         | 2.6        | 100.4       | 53.9         | 2.8        |     |
|                                |                    | Azhi                      | 21        | 79.6        | 63.2         | 2.0        | 70.9        | 30.6         | 4.2        | 76.2        | 38.1         | 3.4        | 122.7        | 98.1         | 2.0        | 24.7        | 18.8         | 2.2        | 109.3       | 79.2         | 2.3        | 29.9        | 23.7         | 2.0        | 80.0        | 64.1         | 2.0        |     |
|                                |                    | Baoshan                   | 8         | 103.7       | 62.0         | 3.1        | 115.2       | 26.0         | 9.6        | 132.5       | 34.8         | 8.0        | 153.4        | 87.8         | 3.4        | 55.8        | 34.5         | 3.1        | 140.0       | 70.6         | 4.0        | 41.2        | 23.3         | 3.9        | 133.8       | 80.6         | 2.9        |     |
|                                |                    | Laibin                    | 23        | 87.0        | 45.6         | 3.0        | 49.2        | 15.8         | 4.7        | 76.7        | 21.4         | 4.7        | 109.3        | 60.6         | 3.1        | 35.4        | 14.1         | 3.6        | 100.1       | 48.0         | 3.6        | 24.3        | 14.8         | 2.8        | 137.1       | 47.1         | 3.7        |     |
|                                |                    | Tangtang                  | 16        | 79.2        | 47.5         | 2.8        | 88.5        | 20.6         | 6.4        | 94.8        | 26.0         | 5.6        | 110.7        | 66.2         | 2.9        | 36.2        | 21.0         | 3.6        | 109.4       | 57.2         | 3.5        | 28.7        | 16.0         | 3.0        | 94.4        | 55.5         | 3.1        |     |
|                                |                    | Yangchang                 | 9         | 35.8        | 33.2         | 1.5        | 15.9        | 14.9         | 1.5        | 18.3        | 17.0         | 1.6        | 51.4         | 45.7         | 1.6        | 11.5        | 10.6         | 1.6        | 39.2        | 34.4         | 1.7        | 14.6        | 12.9         | 1.6        | 34.9        | 33.5         | 1.4        |     |
|                                |                    | <b>Fuyuan Overall</b>     | <b>60</b> | <b>63.9</b> | <b>42.9*</b> | <b>2.5</b> | <b>61.9</b> | <b>21.9*</b> | <b>4.4</b> | <b>68.4</b> | <b>24.5*</b> | <b>4.4</b> | <b>110.8</b> | <b>68.9*</b> | <b>2.7</b> | <b>28.2</b> | <b>15.2*</b> | <b>3.2</b> | <b>87.3</b> | <b>45.4*</b> | <b>3.4</b> | <b>24.9</b> | <b>15.8*</b> | <b>2.6</b> | <b>76.8</b> | <b>50.0*</b> | <b>2.5</b> |     |
|                                |                    | <b>Fuyuan Coking Coal</b> |           | 21          | 97.4         | 67.7†      | 2.5         | 119.5        | 52.1†      | 4.6         | 132.2        | 61.7†      | 4.3          | 177.4        | 120.3†     | 2.6         | 48.3         | 29.3†      | 3.0         | 149.7        | 92.0†      | 3.1         | 39.6         | 25.1†      | 2.9         | 121.3        | 80.5†      | 2.6 |
|                                |                    |                           | Daping    | 7           | 29.4         | 26.6       | 1.6         | 13.2         | 9.4        | 2.5         | 17.6         | 12.1       | 2.6          | 54.7         | 45.3       | 2.0         | 11.8         | 9.7        | 2.2         | 35.5         | 27.8       | 2.2         | 9.0          | 8.3        | 1.6         | 35.2         | 30.5       | 1.8 |
| Enhong                         | 9                  |                           | 99.8      | 85.6        | 1.8          | 110.1      | 88.4        | 2.1          | 124.0      | 101.1       | 2.0          | 176.1      | 153.0        | 1.8          | 42.5       | 36.8        | 1.8          | 147.0      | 128.4       | 1.8          | 47.0       | 35.9        | 2.3          | 112.8      | 98.8        | 1.7          |            |     |
| Haidan                         | 5                  |                           | 188.1     | 163.7       | 1.9          | 285.1      | 221.8       | 2.3          | 307.2      | 248.0       | 2.2          | 351.4      | 306.0        | 1.8          | 109.7      | 91.4        | 2.0          | 314.4      | 269.9       | 1.9          | 69.0       | 61.9        | 1.7          | 257.0      | 216.3       | 2.0          |            |     |
| <b>1/3 Coking Coal</b>         |                    |                           | 8         | 66.9        | 44.7         | 3.2        | 61.9        | 25.9         | 5.3        | 67.6        | 27.9         | 5.0        | 126.4        | 85.4         | 3.2        | 27.5        | 16.6         | 3.7        | 90.9        | 54.5         | 4.3        | 24.3        | 17.6         | 2.8        | 73.5        | 47.5         | 3.3        |     |
|                                | Bagong             |                           | 6         | 63.1        | 55.4         | 1.7        | 61.6        | 33.7         | 3.1        | 66.7        | 34.6         | 3.2        | 122.0        | 106.4        | 1.8        | 29.1        | 22.0         | 2.3        | 87.3        | 75.2         | 1.8        | 24.7        | 21.6         | 1.8        | 63.0        | 57.3         | 1.6        |     |
|                                | Dahe               |                           | 2         | 78.4        | 23.4         | 14.3       | 62.7        | 11.8         | 28.1       | 70.4        | 14.6         | 24.3       | 139.6        | 44.1         | 13.1       | 22.6        | 7.2          | 12.9       | 101.8       | 20.7         | 25.0       | 23.0        | 9.5          | 8.7        | 105.2       | 27.2         | 17.7       |     |
| <b>Gas Fat Coal</b>            |                    |                           | 24        | 34.2        | 28.8         | 1.8        | 15.4        | 10.7         | 2.5        | 16.8        | 11.4         | 2.6        | 46.5         | 38.4         | 1.9        | 11.1        | 8.0          | 2.3        | 32.4        | 23.8         | 2.3        | 13.0        | 10.4         | 1.9        | 40.3        | 33.9         | 1.9        |     |
|                                | Housuo             |                           | 23        | 33.4        | 28.0         | 1.8        | 14.3        | 10.1         | 2.5        | 15.6        | 10.7         | 2.5        | 45.3         | 37.3         | 1.9        | 10.8        | 7.7          | 2.3        | 31.3        | 22.9         | 2.3        | 12.6        | 10.1         | 1.9        | 39.5        | 33.0         | 1.9        |     |
|                                | Qingyun            | 1                         | 53.7      | 53.7        | -            | 39.4       | 39.4        | -            | 44.9       | 44.9        | -            | 74.5       | 74.5         | -            | 17.5       | 17.5        | -            | 59.2       | 59.2        | -            | 21.9       | 21.9        | -            | 60.3       | 60.3        | -            |            |     |
| <b>Meager Lean Coal (Gumu)</b> |                    | 2                         | 55.3      | 36.4        | 4.0          | 16.6       | 7.2         | 8.2          | 22.8       | 9.2         | 9.1          | 119.3      | 94.0         | 2.8          | 26.4       | 22.4        | 2.3          | 75.0       | 29.9        | 9.2          | 16.6       | 11.9        | 3.4          | 60.5       | 43.6        | 3.3          |            |     |
|                                | N                  |                           |           | CHR         |              | IPY        |             |              |            |             |              |            |              |              |            |             |              |            |             |              |            |             |              |            |             |              |            |     |
| <b>Xuanwei</b>                 | <b>Coking Coal</b> |                           | 77        | 85.4        | 48.7         | 3.0        | 51.3        | 33.2         | 2.5        |             |              |            |              |              |            |             |              |            |             |              |            |             |              |            |             |              |            |     |
|                                |                    | Azhi                      | 21        | 94.2        | 69.5         | 2.2        | 46.6        | 36.7         | 2.1        |             |              |            |              |              |            |             |              |            |             |              |            |             |              |            |             |              |            |     |
|                                |                    | Baoshan                   | 8         | 122.0       | 66.8         | 3.4        | 75.8        | 53.0         | 2.4        |             |              |            |              |              |            |             |              |            |             |              |            |             |              |            |             |              |            |     |
|                                |                    | Laibin                    | 23        | 89.2        | 40.8         | 3.6        | 47.8        | 25.5         | 3.0        |             |              |            |              |              |            |             |              |            |             |              |            |             |              |            |             |              |            |     |
|                                |                    | Tangtang                  | 16        | 81.6        | 48.8         | 3.1        | 62.9        | 37.6         | 3.1        |             |              |            |              |              |            |             |              |            |             |              |            |             |              |            |             |              |            |     |
|                                |                    | Yangchang                 | 9         | 29.9        | 25.1         | 1.8        | 28.5        | 27.1         | 1.4        |             |              |            |              |              |            |             |              |            |             |              |            |             |              |            |             |              |            |     |
|                                |                    | <b>Fuyuan Overall</b>     | <b>60</b> | <b>92.9</b> | <b>42.0*</b> | <b>3.7</b> | <b>43.3</b> | <b>29.8*</b> | <b>2.4</b> |             |              |            |              |              |            |             |              |            |             |              |            |             |              |            |             |              |            |     |
|                                |                    | <b>Fuyuan Coking Coal</b> |           | 21          | 169.0        | 93.4†      | 3.5         | 63.2         | 43.4†      | 2.5         |              |            |              |              |            |             |              |            |             |              |            |             |              |            |             |              |            |     |
|                                |                    |                           | Daping    | 7           | 44.0         | 28.0       | 3.1         | 17.1         | 16.6       | 1.3         |              |            |              |              |            |             |              |            |             |              |            |             |              |            |             |              |            |     |
| Enhong                         | 9                  |                           | 140.1     | 121.8       | 1.8          | 65.0       | 55.2        | 1.8          |            |             |              |            |              |              |            |             |              |            |             |              |            |             |              |            |             |              |            |     |
| Haidan                         | 5                  |                           | 395.8     | 312.8       | 2.2          | 124.4      | 107.6       | 1.9          |            |             |              |            |              |              |            |             |              |            |             |              |            |             |              |            |             |              |            |     |
| <b>1/3 Coking Coal</b>         |                    |                           | 8         | 103.5       | 62.8         | 4.4        | 42.9        | 30.2         | 3.3        |             |              |            |              |              |            |             |              |            |             |              |            |             |              |            |             |              |            |     |
|                                | Bagong             |                           | 6         | 101.9       | 89.3         | 1.8        | 45.1        | 41.7         | 1.5        |             |              |            |              |              |            |             |              |            |             |              |            |             |              |            |             |              |            |     |
|                                | Dahe               |                           | 2         | 108.2       | 21.8         | 25.4       | 36.3        | 11.4         | 13.2       |             |              |            |              |              |            |             |              |            |             |              |            |             |              |            |             |              |            |     |
| <b>Gas Fat Coal</b>            |                    |                           | 24        | 23.0        | 17.9         | 2.1        | 27.6        | 22.2         | 2.0        |             |              |            |              |              |            |             |              |            |             |              |            |             |              |            |             |              |            |     |
|                                | Housuo             |                           | 23        | 22.2        | 17.2         | 2.1        | 26.6        | 21.4         | 1.9        |             |              |            |              |              |            |             |              |            |             |              |            |             |              |            |             |              |            |     |
|                                | Qingyun            | 1                         | 41.6      | 41.6        | -            | 50.4       | 50.4        | -            |            |             |              |            |              |              |            |             |              |            |             |              |            |             |              |            |             |              |            |     |
| <b>Meager Lean Coal (Gumu)</b> |                    | 2                         | 89.8      | 53.1        | 4.9          | 25.6       | 19.2        | 3.1          |            |             |              |            |              |              |            |             |              |            |             |              |            |             |              |            |             |              |            |     |
|                                | N                  |                           |           |             |              |            |             |              |            |             |              |            |              |              |            |             |              |            |             |              |            |             |              |            |             |              |            |     |

\* - significant difference between smoky coal subtypes from Fuyuan

† - significant variation within designated smoky coal subtype

N – number of samples

BaP - benzo[a]pyrene, PYR - pyrene, BbF - benzo[b]fluoranthene DBA - dibenz(ah)anthracene, BaA - benzo[a]anthracene, BkF - benzo[k]fluoranthene

BPE - benzo[ghi]perylene, CHR – chrysene, FLT - fluoranthene, IPY - indeno(1,2,3-cd)pyrene

**Table S8- Exploratory factor analysis of log transformed indoor PAH values**

|                            | <b>Factor 1</b> | <b>Factor 2</b> | <b>Factor 3</b> |
|----------------------------|-----------------|-----------------|-----------------|
| EV(% variance explained)   | 3.9(39%)        | 3.7(37%)        | 1.8(18%)        |
| Benzo[ghi]perylene (6)     | 0.49            | <b>0.77</b>     | 0.38            |
| Benzo[b]fluoranthene (5)   | 0.47            | <b>0.56</b>     | <b>0.66</b>     |
| Dibenz[ah]anthracene( 5)   | 0.28            | <b>0.81</b>     | 0.31            |
| Benzo[a]pyrene (5)         | <b>0.63</b>     | <b>0.61</b>     | 0.41            |
| Benzo[k]fluoranthene (5)   | <b>0.61</b>     | <b>0.58</b>     | 0.42            |
| Indeno[1,2,3-cd]pyrene (5) | <b>0.53</b>     | <b>0.77</b>     | 0.27            |
| Pyrene(4)                  | <b>0.87</b>     | 0.39            | 0.29            |
| Fluoranthene(4)            | <b>0.88</b>     | 0.35            | 0.31            |
| Chrysene(4)                | <b>0.55</b>     | <b>0.52</b>     | <b>0.62</b>     |
| Benzo[a]anthracene (4)     | <b>0.69</b>     | <b>0.56</b>     | 0.42            |

Values in bold (Eigen value > 0.5) are considered to be contributory to that factor  
Numbers in parentheses represent number of carbon rings for respective PAH  
Factor analysis was performed with varimax rotation

**Table S9 - Mixed effect model for indoor PAH measurements (using PAHs and variables selected for personal measurements)**

|                                         | BaP      |             |      | FLT      |             |       | CHR      |             |      |
|-----------------------------------------|----------|-------------|------|----------|-------------|-------|----------|-------------|------|
| Reference/Background Value (Intercept)* | 3.04     |             |      | 1.65     |             |       | 3.0      |             |      |
| Fuel Type                               | Estimate | 95% CI      | GMR  | Estimate | 95% CI      | GMR   | Estimate | 95% CI      | GMR  |
| Smokeless Coal (FY & XW)                | Ref      |             | 1    | Ref      |             | 1     | Ref      |             | 1    |
| Coking Coal from North XW               | 0.82     | 0.19,1.44   | 2.27 | 1.1      | 0.16,2.03   | 3     | 1.01     | 0.29,1.72   | 2.75 |
| Coking Coal from South XW               | 0.93     | -0.22,2.07  | 2.54 | 1.51     | -0.2,3.22   | 4.53  | 0.83     | -0.42,2.11  | 2.3  |
| Coking Coal from FY                     | 0.47     | -0.24,1.19  | 1.61 | 0.84     | -0.23,1.93  | 2.33  | 0.75     | -0.11,1.6   | 2.11 |
| 1/3 Coking coal FY                      | 0.8      | -0.17,1.75  | 2.23 | 1.76     | 0.33,3.17   | 5.79  | 1.21     | 0.15,2.25   | 3.35 |
| Gas Fat coal FY                         | 0.26     | -0.5,1.02   | 1.3  | 0.48     | -0.64,1.6   | 1.62  | 0.01     | -0.85,0.86  | 1.01 |
| Meagre Lean coal FY                     | 0.67     | -0.66,2     | 1.95 | 0.45     | -1.54,2.44  | 1.56  | 1.07     | -0.51,2.66  | 2.92 |
| Multiple Coal Types                     | 0.53     | -0.04,1.1   | 1.7  | 1.11     | 0.27,1.96   | 3.04  | 0.76     | 0.09,1.42   | 2.13 |
| Multiple Fuel Types                     | 0.64     | 0.11,1.16   | 1.89 | 1.23     | 0.46,2.02   | 3.43  | 0.69     | 0.07,1.3    | 1.98 |
| Smoky Coal of uncertain type            | 1.42     | 0.53,2.3    | 4.12 | 3.31     | 1.98,4.65   | 27.39 | 1.91     | 0.84,2.98   | 6.77 |
| Plant Products                          | 0.02     | -1.05,1.1   | 1.02 | 0.83     | -0.78,2.48  | 2.3   | 0.22     | -1.07,1.51  | 1.24 |
| Wood                                    | 0.05     | -0.84,0.97  | 1.06 | 0.95     | -0.4,2.34   | 2.59  | 0.13     | -0.95,1.23  | 1.14 |
| <b>Stove Design</b>                     |          |             |      |          |             |       |          |             |      |
| Ventilated Stove                        | Ref      |             | 1    | Ref      |             | 1     | Ref      |             | 1    |
| Unventilated Stove                      | 0.51     | 0.07,0.95   | 1.67 | 0.67     | 0.1,1.34    | 1.95  | 0.73     | 0.2,1.25    | 2.07 |
| Fire Pit                                | 0.92     | 0.24,1.58   | 2.51 | 1.54     | 0.52,2.52   | 4.66  | 1.02     | 0.21,1.81   | 2.77 |
| Portable Stove                          | 0.14     | -0.26,0.54  | 1.15 | 0.17     | -0.43,0.76  | 1.18  | 0.37     | -0.11,0.84  | 1.44 |
| Mixed Ventilation                       | 0.29     | -0.01,0.59  | 1.33 | 0.22     | -0.23,0.67  | 1.25  | 0.44     | 0.08,0.81   | 1.56 |
| Unknown ventilation                     | -0.79    | -1.49,-0.09 | 0.45 | -1.53    | -2.58,-0.47 | 0.22  | -1.2     | -2.03,-0.36 | 0.3  |
| <b>Room size (in m<sup>3</sup>)</b>     |          |             |      |          |             |       |          |             |      |
| <40m <sup>3</sup>                       | Ref      |             | 1    | Ref      |             | 1     | Ref      |             | 1    |
| 40m <sup>3</sup> to 49m <sup>3</sup>    | -0.42    | -0.81,-0.03 | 0.66 | -0.51    | -1.1,0.06   | 0.6   | -0.69    | -1.17,-0.22 | 0.5  |
| 50m <sup>3</sup> to 67m <sup>3</sup>    | 0.07     | -0.35,0.49  | 1.08 | 0.41     | -0.23,1.04  | 1.5   | 0        | -0.5,0.51   | 1    |
| >67m <sup>3</sup>                       | 0.11     | -0.31,0.53  | 1.12 | 0.5      | -0.14,1.12  | 1.64  | -0.03    | -0.53,0.48  | 0.97 |
| Room Size Unknown                       | -0.35    | -0.76,0.06  | 0.7  | -0.21    | -0.82,0.39  | 0.81  | -0.47    | -0.96,0.02  | 0.63 |
| <b>Season</b>                           |          |             |      |          |             |       |          |             |      |
| Autumn                                  | Ref      |             | 1    | Ref      |             | 1     | Ref      |             | 1    |
| Winter                                  | -0.15    | -0.47,0.17  | 0.86 | 0.17     | -0.32,0.65  | 1.18  | 0.06     | -0.31,0.42  | 1.06 |
| Spring/Summer                           | -0.09    | -0.37,0.18  | 0.91 | -0.62    | -1.03,-0.21 | 0.54  | -0.32    | -0.63,0     | 0.73 |
| <b>Variance explained (%)</b>           |          |             |      |          |             |       |          |             |      |
| Between Subjects                        | 46       |             |      | 57       |             |       | 39       |             |      |
| Between Villages                        | 24       |             |      | 36       |             |       | 50       |             |      |

\*Reference value represents log transformed PAH value (in ng/m<sup>3</sup>) for the reference model entry (smokeless coals from Fuyuan, burnt in a ventilated stove in a "small" room)

GMR: = geometric mean ratio = GM(estimate)/GM(reference)=exp(Estimate)

BaP - benzo[a]pyrene, FLT – fluoranthene, CHR – chrysene

**Table S10a- Mixed effect models for personal exposure to particle bound PAHs**

| Reference/Background Value (Intercept)* | BPE      |         |      | BbF      |             |      | DBA      |            |      | BkF      |             |      |
|-----------------------------------------|----------|---------|------|----------|-------------|------|----------|------------|------|----------|-------------|------|
|                                         | Estimate | 95% CI  | GMR  | Estimate | 95% CI      | GMR  | Estimate | 95% CI     | GMR  | Estimate | 95% CI      | GMR  |
| <b>Fuel Type</b>                        |          | 2.4     |      |          | 3.08        |      |          | 1.05       |      |          | 1.53        |      |
| Smokeless Coal (FY & XW)                | Ref      |         | 1    | Ref      |             | 1    | Ref      |            | 1    | Ref      |             | 1    |
| Coking Coal from North XW               | 1.27     | 1.96,0  | 3.58 | 1.12     | 0.5,1.73    | 3.07 | 1.42     | 0.71,2.12  | 4.15 | 1.12     | 0.47,1.76   | 3.08 |
| Coking Coal from South XW               | 0.72     | 1.86,0  | 2.05 | 0.43     | -0.53,1.39  | 1.53 | 0.77     | -0.37,1.92 | 2.16 | 0.56     | -0.5,1.6    | 1.75 |
| Coking Coal from FY                     | 0.9      | 1.74,0  | 2.46 | 1.14     | 0.36,1.9    | 3.11 | 1.36     | 0.5,2.21   | 3.89 | 0.93     | 0.14,1.7    | 2.52 |
| 1/3 Coking coal FY                      | 0.39     | 1.37,0  | 1.48 | 0.44     | -0.46,1.28  | 1.55 | 0.51     | -0.54,1.51 | 1.67 | 0.26     | -0.7,1.17   | 1.3  |
| Gas Fat coal FY                         | 0.35     | 1.18,0  | 1.42 | 0.27     | -0.46,0.98  | 1.31 | 0.07     | -0.77,0.89 | 1.07 | 0.38     | -0.4,1.14   | 1.46 |
| Meagre Lean coal FY                     | 0.22     | 1.74,0  | 1.25 | 1.24     | -0.15,2.61  | 3.45 | 1.45     | -0.12,3.01 | 4.27 | 0.7      | -0.71,2.1   | 2.02 |
| Multiple Coal Types                     | 0.93     | 1.57,0  | 2.53 | 0.78     | 0.2,1.35    | 2.18 | 1.04     | 0.37,1.71  | 2.83 | 0.82     | 0.21,1.43   | 2.27 |
| Multiple Fuel Types                     | 0.9      | 1.49,0  | 2.45 | 0.87     | 0.32,1.42   | 2.39 | 0.79     | 0.17,1.4   | 2.2  | 0.84     | 0.26,1.41   | 2.31 |
| Smoky Coal of uncertain type            | 1.38     | 2.39,0  | 3.97 | 1.49     | 0.55,2.42   | 4.42 | 1.16     | 0.08,2.23  | 3.18 | 0.99     | 0.04,1.94   | 2.69 |
| Plant Products                          | -0.01    | 1.25,0  | 0.99 | 0.24     | -0.95,1.43  | 1.27 | -0.09    | -1.44,1.26 | 0.91 | 0.13     | -1.08,1.34  | 1.14 |
| Wood                                    | 0.2      | 1.24,0  | 1.23 | 0.45     | -0.51,1.41  | 1.57 | 0.04     | -1.02,1.11 | 1.04 | 0.45     | -0.52,1.42  | 1.57 |
| <b>Stove Design</b>                     |          |         |      |          |             |      |          |            |      |          |             |      |
| Ventilated Stove                        | Ref      |         | 1    | Ref      |             | 1    | Ref      |            | 1    | Ref      |             | 1    |
| Unventilated Stove                      | 0.51     | 1.02,0  | 1.66 | 0.67     | 0.18,1.15   | 1.95 | 0.73     | 0.17,1.29  | 2.07 | 0.45     | -0.04,0.94  | 1.57 |
| Fire Pit                                | 1.24     | 1.98,0  | 3.44 | 1.08     | 0.38,1.76   | 2.93 | 1.18     | 0.41,1.94  | 3.24 | 1.07     | 0.38,1.76   | 2.92 |
| Portable Stove                          | 0.35     | 0.82,0  | 1.43 | 0.52     | 0.09,0.95   | 1.69 | 0.48     | -0.01,0.97 | 1.62 | 0.2      | -0.23,0.63  | 1.22 |
| Mixed Ventilation                       | 0        | 0.36,0  | 1    | 0.09     | -0.25,0.42  | 1.09 | -0.02    | -0.41,0.36 | 0.98 | 0.1      | -0.23,0.44  | 1.11 |
| Unknown ventilation                     | -0.97    | -0.14,0 | 0.38 | -0.91    | -1.67,-0.14 | 0.4  | -0.94    | -1.8,-0.08 | 0.39 | -0.96    | -1.72,-0.19 | 0.38 |
| <b>Room size (in m3)</b>                |          |         |      |          |             |      |          |            |      |          |             |      |
| <40m3                                   | Ref      |         | 1    | Ref      |             | 1    | Ref      |            | 1    | Ref      |             | 1    |
| 40m3 to 49m3                            | -0.34    | 0.13,0  | 0.71 | -0.46    | -0.9,-0.03  | 0.63 | -0.37    | -0.86,0.11 | 0.69 | -0.28    | -0.71,0.15  | 0.76 |
| 50m3 to 67m3                            | 0.63     | 1.13,0  | 1.87 | 0.4      | -0.07,0.86  | 1.49 | 0.48     | -0.05,0.99 | 1.61 | 0.47     | 0.0,0.94    | 1.61 |
| >67m3                                   | 0.21     | 0.71,0  | 1.24 | -0.14    | -0.61,0.33  | 0.87 | 0.1      | -0.42,0.63 | 1.11 | -0.01    | -0.47,0.46  | 0.99 |
| Room Size Unknown                       | 0.07     | 0.55,0  | 1.08 | -0.08    | -0.53,0.37  | 0.92 | 0.04     | -0.47,0.53 | 1.04 | -0.02    | -0.47,0.43  | 0.98 |
| <b>Season</b>                           |          |         |      |          |             |      |          |            |      |          |             |      |
| Autumn                                  | Ref      |         | 1    | Ref      |             | 1    | Ref      |            | 1    | Ref      |             | 1    |
| Winter                                  | 0.12     | 0.47,0  | 1.13 | 0.28     | -0.02,0.58  | 1.33 | 0.28     | -0.09,0.64 | 1.33 | 0.29     | -0.03,0.6   | 1.33 |
| Spring/Summer                           | 0.12     | 0.41,0  | 1.13 | -0.04    | -0.3,0.23   | 0.97 | 0.52     | 0.19,0.84  | 1.68 | 0.02     | -0.26,0.29  | 1.02 |
| <b>Variance explained</b>               |          |         |      |          |             |      |          |            |      |          |             |      |
| Between Subjects                        |          | 40      |      |          | 32          |      |          | 32         |      |          | 31          |      |
| Between Villages                        |          | 53      |      |          | 80          |      |          | 72         |      |          | 65          |      |

\*Reference value represents log transformed PAH value (in ng/m<sup>3</sup>) for the reference model entry (smokeless coals from Fuyuan, burnt in a ventilated stove in a “small” room)

GMR: = geometric mean ratio = GM(estimate)/GM(reference)=exp(estimate)

BPE – Benzo[ghi]perylene, BbF – Benzo[b]fluoranthene, DBA – Dibenz[ah]anthracene, BkF – Benzo[k]fluoranthene

**Table S10b- Mixed effect models for personal exposure to particle bound PAHs**

| Reference/Background Value (Intercept)* | IPY      |             |      | PYR      |             |      | BaA      |             |      |
|-----------------------------------------|----------|-------------|------|----------|-------------|------|----------|-------------|------|
|                                         | Estimate | 95% CI      | GMR  | Estimate | 95% CI      | GMR  | Estimate | 95% CI      | GMR  |
| <b>Fuel Type</b>                        |          | 2.2         |      | 1.55     |             |      | 2.21     |             |      |
| Smokeless Coal (FY & XW)                | Ref      |             | 1    | Ref      |             | 1    | Ref      |             | 1    |
| Coking Coal from North XW               | 1.01     | 0.39,1.61   | 2.73 | 1.12     | 0.19,2.04   | 3.06 | 1.55     | 0.78,2.31   | 4.72 |
| Coking Coal from South XW               | 0.53     | -0.46,1.5   | 1.7  | 0.52     | -1.13,2.13  | 1.68 | 0.95     | -0.37,2.26  | 2.59 |
| Coking Coal from FY                     | 0.92     | 0.18,1.65   | 2.51 | 0.73     | -0.4,1.85   | 2.07 | 1.37     | 0.44,2.3    | 3.94 |
| 1/3 Coking coal FY                      | 0.03     | -0.9,0.9    | 1.03 | 0.09     | -1.33,1.45  | 1.09 | 0.57     | -0.59,1.67  | 1.76 |
| Gas Fat coal FY                         | 0.33     | -0.41,1.04  | 1.39 | 0.06     | -1.07,1.16  | 1.06 | 0.48     | -0.43,1.37  | 1.62 |
| Meagre Lean coal FY                     | 0.73     | -0.61,2.06  | 2.08 | 0.27     | -1.75,2.28  | 1.31 | 1.06     | -0.6,2.73   | 2.9  |
| Multiple Coal Types                     | 0.79     | 0.21,1.37   | 2.21 | 0.95     | 0.08,1.81   | 2.58 | 1.23     | 0.53,1.93   | 3.43 |
| Multiple Fuel Types                     | 0.82     | 0.28,1.37   | 2.28 | 0.98     | 0.16,1.8    | 2.66 | 1.24     | 0.58,1.9    | 3.45 |
| Smoky Coal of uncertain type            | 0.83     | -0.09,1.76  | 2.3  | 1.51     | 0.17,2.86   | 4.54 | 1.66     | 0.56,2.75   | 5.25 |
| Plant Products                          | 0.14     | -1.02,1.3   | 1.15 | -0.23    | -1.94,1.49  | 0.8  | 0.38     | -1.02,1.78  | 1.46 |
| Wood                                    | 0.52     | -0.4,1.44   | 1.68 | 0.45     | -0.92,1.83  | 1.56 | 0.95     | -0.19,2.09  | 2.57 |
| <b>Stove Design</b>                     |          |             |      |          |             |      |          |             |      |
| Ventilated Stove                        | Ref      |             | 1    | Ref      |             | 1    | Ref      |             | 1    |
| Unventilated Stove                      | 0.34     | -0.13,0.81  | 1.41 | 0.33     | -0.36,1.02  | 1.39 | 0.45     | -0.12,1.02  | 1.57 |
| Fire Pit                                | 1.05     | 0.39,1.7    | 2.85 | 1.73     | 0.74,2.7    | 5.62 | 1.16     | 0.34,1.98   | 3.2  |
| Portable Stove                          | 0.11     | -0.31,0.52  | 1.11 | 0.2      | -0.41,0.82  | 1.23 | 0.36     | -0.15,0.87  | 1.43 |
| Mixed Ventilation                       | -0.01    | -0.34,0.31  | 0.99 | 0.12     | -0.36,0.6   | 1.13 | 0.06     | -0.33,0.45  | 1.06 |
| Unknown ventilation                     | -0.8     | -1.53,-0.06 | 0.45 | -1.31    | -2.4,-0.22  | 0.27 | -1.29    | -2.19,-0.39 | 0.27 |
| <b>Room size (in m<sup>3</sup>)</b>     |          |             |      |          |             |      |          |             |      |
| <40m <sup>3</sup>                       | Ref      |             | 1    | Ref      |             | 1    | Ref      |             | 1    |
| 40m <sup>3</sup> to 49m <sup>3</sup>    | -0.22    | -0.64,0.19  | 0.8  | 0.1      | -0.5,0.71   | 1.11 | -0.27    | -0.78,0.24  | 0.77 |
| 50m <sup>3</sup> to 67m <sup>3</sup>    | 0.47     | 0.03,0.92   | 1.61 | 0.84     | 0.18,1.5    | 2.31 | 0.59     | 0.03,1.14   | 1.8  |
| >67m <sup>3</sup>                       | 0.12     | -0.33,0.56  | 1.12 | 0.44     | -0.23,1.1   | 1.55 | 0.13     | -0.42,0.68  | 1.14 |
| Room Size Unknown                       | 0.03     | -0.4,0.46   | 1.03 | 0.38     | -0.25,1.01  | 1.46 | 0.08     | -0.45,0.6   | 1.08 |
| <b>Season</b>                           |          |             |      |          |             |      |          |             |      |
| Autumn                                  | Ref      |             | 1    | Ref      |             | 1    | Ref      |             | 1    |
| Winter                                  | 0.17     | -0.15,0.47  | 1.18 | 0.68     | 0.22,1.14   | 1.98 | 0.36     | -0.01,0.74  | 1.44 |
| Spring/Summer                           | 0.23     | -0.04,0.5   | 1.26 | -0.56    | -0.96,-0.16 | 0.57 | -0.26    | -0.58,0.06  | 0.77 |
| <b>Variance explained</b>               |          |             |      |          |             |      |          |             |      |
| Between Subjects                        |          | 32          |      |          | 36          |      |          | 35          |      |
| Between Villages                        |          | 65          |      |          | 54          |      |          | 62          |      |

\*Reference value represents log transformed PAH value (in ng/m<sup>3</sup>) for the reference model entry (smokeless coals from Fuyuan, burnt in a ventilated stove in a "small" room)

GMR: = geometric mean ratio = GM(estimate)/GM(reference)=exp(Estimate)

IPY – Indeno[1,2,3-cd]pyrene, PYR – Pyrene, BaA – Benzo[a]anthracene

**Table S11 - Mixed effect models for personal exposure to gas-phase PAHs**

| Reference/Background Value (Intercept)* | PHE      |            |      | ANY      |            |      | FLU      |            |      |
|-----------------------------------------|----------|------------|------|----------|------------|------|----------|------------|------|
|                                         | Estimate | 95% CI     | GMR  | Estimate | 95% CI     | GMR  | Estimate | 95% CI     | GMR  |
|                                         |          | 4.84       |      |          | 5.49       |      |          | 4.39       |      |
| <b>Fuel Type</b>                        | Estimate | 95% CI     | GMR  | Estimate | 95% CI     | GMR  | Estimate | 95% CI     | GMR  |
| Smokeless Coal (FY & XW)                | Ref      |            | 1    | Ref      |            | 1    | Ref      |            | 1    |
| Coking Coal from North XW               | 0.43     | 4.16,5.55  | 1.54 | 0        | 4.73,6.27  | 1    | 0.51     | 3.69,5.09  | 1.67 |
| Coking Coal from South XW               | -        | -          | -    | -        | -          | -    | -        | -          | -    |
| Coking Coal from FY                     | 0.66     | -0.26,1.08 | 1.94 | -0.36    | -0.75,0.73 | 0.7  | 0.39     | -0.17,1.18 | 1.48 |
| 1/3 Coking coal FY                      | 0.78     | -0.47,1.66 | 2.17 | 0.06     | -1.5,0.81  | 1.06 | 0.76     | -0.69,1.47 | 2.14 |
| Gas Fat coal FY                         | 0.32     | -0.62,2.18 | 1.37 | 0.06     | -1.43,1.55 | 1.06 | 0.43     | -0.62,2.16 | 1.53 |
| Meagre Lean coal FY                     | 1.54     | -0.49,1.08 | 4.67 | 0.27     | -0.85,0.95 | 1.3  | 0.98     | -0.39,1.22 | 2.65 |
| Multiple Coal Types                     | 0.65     | 0.16,2.9   | 1.92 | 0.19     | -1.21,1.73 | 1.21 | 0.63     | -0.38,2.31 | 1.88 |
| Multiple Fuel Types                     | 0.81     | -0.09,1.38 | 2.24 | 0.58     | -0.61,0.99 | 1.78 | 0.76     | -0.1,1.36  | 2.13 |
| Smoky Coal of uncertain type            | 0.67     | 0.16,1.43  | 1.96 | 0.27     | -0.15,1.29 | 1.31 | 0.86     | 0.11,1.39  | 2.37 |
| Plant Products                          | 0.85     | -0.28,1.63 | 2.34 | 0.78     | -0.7,1.23  | 2.18 | 0.44     | -0.05,1.76 | 1.55 |
| Wood                                    | -0.53    | -0.67,2.34 | 0.59 | -0.36    | -0.82,2.38 | 0.69 | -0.73    | -1.03,1.91 | 0.48 |
| <b>Stove Design</b>                     |          |            |      |          |            |      |          |            |      |
| Ventilated Stove                        | Ref      |            | 1    | Ref      |            | 1    | Ref      |            | 1    |
| Unventilated Stove                      | 1.2      | -1.83,0.76 | 3.33 | 0.69     | -1.74,1.01 | 1.99 | 1.02     | -1.99,0.53 | 2.78 |
| Fire Pit                                | 1.75     | 0.51,1.5   | 5.73 | 1.52     | -0.13,0.91 | 4.56 | 1.79     | 0.39,1.34  | 6.01 |
| Portable Stove                          | 1.01     | 0.59,1.76  | 2.73 | 0.4      | 0.07,1.31  | 1.49 | 0.87     | 0.44,1.61  | 2.38 |
| Mixed Ventilation                       | 0.11     | 0.75,2.72  | 1.12 | -0.03    | 0.52,2.52  | 0.97 | 0.05     | 0.85,2.72  | 1.05 |
| Unknown ventilation                     | -0.47    | -0.28,0.51 | 0.62 | -0.69    | -0.44,0.38 | 0.5  | -0.73    | -0.33,0.43 | 0.48 |
| <b>Room size (in m<sup>3</sup>)</b>     |          |            |      |          |            |      |          |            |      |
| <40m <sup>3</sup>                       | Ref      |            | 1    | Ref      |            | 1    | Ref      |            | 1    |
| 40m <sup>3</sup> to 49m <sup>3</sup>    | -0.25    | 0.13,0.76  | 0.78 | 0.01     | -0.15,0.53 | 1.01 | -0.11    | -0.01,0.61 | 0.9  |
| 50m <sup>3</sup> to 67m <sup>3</sup>    | 0.51     | -0.8,0.29  | 1.67 | 0.79     | -0.53,0.55 | 2.2  | 0.7      | -0.63,0.4  | 2.02 |
| >67m <sup>3</sup>                       | 0.13     | -0.05,1.06 | 1.13 | 0.36     | 0.22,1.33  | 1.44 | 0.25     | 0.15,1.22  | 1.28 |
| Room Size Unknown                       | -0.11    | -0.42,0.67 | 0.89 | 0.22     | -0.18,0.91 | 1.25 | 0.08     | -0.27,0.75 | 1.09 |
| <b>Season</b>                           |          |            |      |          |            |      |          |            |      |
| Autumn                                  | Ref      |            | 1    | Ref      |            | 1    | Ref      |            | 1    |
| Winter                                  | 0.52     | -1.24,0.29 | 1.67 | 0.42     | -1.48,0.11 | 1.52 | 0.46     | -1.46,0.01 | 1.58 |
| Spring/Summer                           | 0.45     | 0.14,0.88  | 1.56 | 0.19     | -0.01,0.83 | 1.21 | 0.31     | 0.07,0.83  | 1.36 |
| <b>Variance explained</b>               |          |            |      |          |            |      |          |            |      |
| Between Subjects                        |          | 67         |      |          | 100        |      |          | 87         |      |
| Between Villages                        |          | 100        |      |          | 71         |      |          | 84         |      |

\*Reference value represents log transformed PAH value (in ng/m<sup>3</sup>) for the reference model entry (smokeless coals from Fuyuan, burnt in a ventilated stove in a "small" room)

GMR: = geometric mean ratio = GM(estimate)/GM(reference)=exp(Estimate)

PHE - Phenanthrene, ANY - Acenaphthylene, FLU - Fluorine



**Table S12a - Mixed effect models for indoor measurements of particle bound PAHs**

| Reference/Background Value (Intercept)* | BPE      |             |      | BbF      |             |      | DBA      |            |      | BkF      |             |      |
|-----------------------------------------|----------|-------------|------|----------|-------------|------|----------|------------|------|----------|-------------|------|
|                                         | Estimate | 95% CI      | GMR  | Estimate | 95% CI      | GMR  | Estimate | 95% CI     | GMR  | Estimate | 95% CI      | GMR  |
| <b>Fuel Type</b>                        |          | 3.12        |      | 3.63     |             |      | 1.79     |            |      | 1.98     |             |      |
| Smokeless Coal (FY & XW)                | Ref      |             | 1    | Ref      |             | 1    | Ref      |            | 1    | Ref      |             | 1    |
| Coking Coal from North XW               | 0.89     | 0.23,1.54   | 2.44 | 0.78     | 0.16,1.39   | 2.18 | 1.02     | 0.32,1.71  | 2.78 | 0.85     | 0.22,1.48   | 2.34 |
| Coking Coal from South XW               | 0.76     | -0.39,1.9   | 2.13 | 0.62     | -0.4,1.67   | 1.86 | 0.38     | -0.7,1.46  | 1.46 | 0.64     | -0.46,1.72  | 1.91 |
| Coking Coal from FY                     | 0.53     | -0.24,1.3   | 1.7  | 0.61     | -0.13,1.34  | 1.84 | 0.81     | -0.02,1.64 | 2.26 | 0.62     | -0.11,1.35  | 1.85 |
| 1/3 Coking coal FY                      | 0.82     | -0.16,1.79  | 2.28 | 0.89     | 0.01,1.75   | 2.43 | 0.7      | -0.28,1.66 | 2.01 | 0.96     | 0.03,1.88   | 2.62 |
| Gas Fat coal FY                         | 0.22     | -0.6,1.01   | 1.24 | 0.07     | -0.66,0.8   | 1.08 | 0.19     | -0.64,1.01 | 1.21 | 0.37     | -0.38,1.12  | 1.45 |
| Meagre Lean coal FY                     | 0.69     | -0.74,2.12  | 1.99 | 1.08     | -0.29,2.44  | 2.93 | 1.6      | 0,3.19     | 4.93 | 0.86     | -0.49,2.21  | 2.37 |
| Multiple Coal Types                     | 0.49     | -0.13,1.11  | 1.63 | 0.48     | -0.1,1.05   | 1.61 | 0.55     | -0.13,1.23 | 1.74 | 0.51     | -0.08,1.11  | 1.67 |
| Multiple Fuel Types                     | 0.63     | 0.07,1.19   | 1.88 | 0.62     | 0.09,1.15   | 1.86 | 0.57     | -0.06,1.2  | 1.77 | 0.74     | 0.2,1.28    | 2.1  |
| Smoky Coal of uncertain type            | 1.69     | 0.73,2.64   | 5.4  | 1.48     | 0.54,2.42   | 4.39 | 1.53     | 0.42,2.65  | 4.64 | 1.42     | 0.5,2.34    | 4.13 |
| Plant Products                          | -0.51    | -1.66,0.66  | 0.6  | 0.08     | -1.04,1.21  | 1.08 | -0.64    | -1.95,0.68 | 0.53 | 0.39     | -0.72,1.52  | 1.48 |
| Wood                                    | -0.48    | -1.44,0.49  | 0.62 | -0.04    | -0.98,0.92  | 0.96 | -0.78    | -1.86,0.33 | 0.46 | 0.19     | -0.73,1.13  | 1.21 |
| <b>Stove Design</b>                     |          |             |      |          |             |      |          |            |      |          |             |      |
| Ventilated Stove                        | Ref      |             | 1    | Ref      |             | 1    | Ref      |            | 1    | Ref      |             | 1    |
| Unventilated Stove                      | 0.41     | -0.06,0.88  | 1.51 | 0.67     | 0.22,1.12   | 1.96 | 0.43     | -0.1,0.96  | 1.54 | 0.45     | 0,0.89      | 1.56 |
| Fire Pit                                | 0.92     | 0.19,1.62   | 2.51 | 0.88     | 0.17,1.57   | 2.42 | 0.71     | -0.11,1.5  | 2.04 | 0.85     | 0.16,1.51   | 2.33 |
| Portable Stove                          | 0.16     | -0.27,0.58  | 1.17 | 0.31     | -0.1,0.72   | 1.36 | 0.09     | -0.4,0.58  | 1.1  | 0.02     | -0.39,0.43  | 1.02 |
| Mixed Ventilation                       | 0.23     | -0.1,0.55   | 1.26 | 0.39     | 0.07,0.7    | 1.47 | 0.11     | -0.27,0.49 | 1.12 | 0.31     | 0,0.62      | 1.37 |
| Unknown ventilation                     | -0.87    | -1.61,-0.12 | 0.42 | -0.82    | -1.54,-0.09 | 0.44 | -0.96    | -1.83,-0.1 | 0.38 | -0.93    | -1.64,-0.21 | 0.4  |
| <b>Room size (in m<sup>3</sup>)</b>     |          |             |      |          |             |      |          |            |      |          |             |      |
| <40m <sup>3</sup>                       | Ref      |             | 1    | Ref      |             | 1    | Ref      |            | 1    | Ref      |             | 1    |
| 40m <sup>3</sup> to 49m <sup>3</sup>    | -0.47    | -0.89,-0.06 | 0.62 | -0.58    | -1,-0.17    | 0.56 | -0.43    | -0.92,0.05 | 0.65 | -0.4     | -0.8,-0.01  | 0.67 |
| 50m <sup>3</sup> to 67m <sup>3</sup>    | 0.08     | -0.37,0.52  | 1.08 | -0.01    | -0.45,0.44  | 0.99 | 0.08     | -0.44,0.6  | 1.08 | 0.05     | -0.38,0.48  | 1.05 |
| >67m <sup>3</sup>                       | 0.11     | -0.34,0.55  | 1.11 | -0.09    | -0.53,0.35  | 0.91 | 0.12     | -0.38,0.63 | 1.13 | -0.02    | -0.45,0.4   | 0.98 |
| Room Size Unknown                       | -0.36    | -0.79,0.08  | 0.7  | -0.56    | -0.98,-0.13 | 0.57 | -0.18    | -0.68,0.33 | 0.84 | -0.48    | -0.9,-0.07  | 0.62 |
| <b>Season</b>                           |          |             |      |          |             |      |          |            |      |          |             |      |
| Autumn                                  | Ref      |             | 1    | Ref      |             | 1    | Ref      |            | 1    | Ref      |             | 1    |
| Winter                                  | -0.03    | -0.37,0.31  | 0.97 | -0.05    | -0.37,0.25  | 0.95 | 0.39     | 0.03,0.73  | 1.47 | 0.03     | -0.29,0.35  | 1.03 |
| Spring/Summer                           | -0.09    | -0.38,0.21  | 0.92 | -0.1     | -0.37,0.17  | 0.91 | 0.14     | -0.19,0.46 | 1.14 | 0.09     | -0.19,0.37  | 1.09 |
| <b>Variance explained</b>               |          |             |      |          |             |      |          |            |      |          |             |      |
| Between Subjects                        |          | 52          |      |          | 35          |      |          | 39         |      |          | 45          |      |
| Between Villages                        |          | 28          |      |          | 47          |      |          | 74         |      |          | 39          |      |

\*Reference value represents log transformed PAH value (in ng/m<sup>3</sup>) for the reference model entry (smokeless coals from Fuyuan, burnt in a ventilated stove in a "small" room)

GMR: = geometric mean ratio = GM(estimate)/GM(reference)=exp(Estimate)

BPE – Benzo[ghi]perylene, BbF – Benzo[b]fluoranthene, DBA – Dibenz[ah]anthracene, BkF – Benzo[k]fluoranthene

**Table 12b- Mixed effect models for indoor measurements of particle bound PAHs**

| Reference/Background Value (Intercept)* | IPY      |             |      | PYR      |             |       | BaA      |             |      |
|-----------------------------------------|----------|-------------|------|----------|-------------|-------|----------|-------------|------|
|                                         | Estimate | 95% CI      | GMR  | Estimate | 95% CI      | GMR   | Estimate | 95% CI      | GMR  |
| <b>Fuel Type</b>                        |          | 2.83        |      | 1.8      |             |       | 2.72     |             |      |
| Smokeless Coal (FY & XW)                | Ref      |             | 1    | Ref      |             | 1     | Ref      |             | 1    |
| Coking Coal from North XW               | 0.72     | 0.12,1.31   | 2.05 | 1.15     | 0.24,2.06   | 3.15  | 1.24     | 0.5,1.97    | 3.45 |
| Coking Coal from South XW               | 0.71     | -0.31,1.73  | 2.04 | 1.46     | -0.21,3.13  | 4.31  | 1.35     | 0.01,2.69   | 3.86 |
| Coking Coal from FY                     | 0.41     | -0.29,1.11  | 1.51 | 0.78     | -0.26,1.84  | 2.19  | 0.85     | 0.01,1.7    | 2.33 |
| 1/3 Coking coal FY                      | 0.38     | -0.53,1.26  | 1.46 | 1.64     | 0.23,3.04   | 5.16  | 1.24     | 0.11,2.35   | 3.45 |
| Gas Fat coal FY                         | 0.24     | -0.49,0.96  | 1.28 | 0.38     | -0.72,1.48  | 1.47  | 0.45     | -0.44,1.34  | 1.57 |
| Meagre Lean coal FY                     | 0.65     | -0.66,1.96  | 1.91 | 0.41     | -1.52,2.36  | 1.51  | 0.72     | -0.84,2.29  | 2.05 |
| Multiple Coal Types                     | 0.42     | -0.15,0.99  | 1.52 | 1.11     | 0.29,1.95   | 3.05  | 0.95     | 0.28,1.62   | 2.57 |
| Multiple Fuel Types                     | 0.57     | 0.05,1.09   | 1.77 | 1.16     | 0.4,1.92    | 3.18  | 0.94     | 0.34,1.55   | 2.57 |
| Smoky Coal of uncertain type            | 0.92     | 0.02,1.82   | 2.5  | 3.36     | 2.08,4.66   | 28.93 | 2.14     | 1.1,3.19    | 8.53 |
| Plant Products                          | -0.14    | -1.22,0.94  | 0.87 | 0.75     | -0.82,2.34  | 2.11  | 0.32     | -0.94,1.6   | 1.38 |
| Wood                                    | 0.02     | -0.87,0.93  | 1.02 | 0.95     | -0.35,2.29  | 2.58  | 0.36     | -0.69,1.44  | 1.43 |
| <b>Stove Design</b>                     |          |             |      |          |             |       |          |             |      |
| Ventilated Stove                        | Ref      |             | 1    | Ref      |             | 1     | Ref      |             | 1    |
| Unventilated Stove                      | 0.33     | -0.11,0.76  | 1.39 | 0.75     | 0.11,1.4    | 2.13  | 0.7      | 0.18,1.22   | 2.02 |
| Fire Pit                                | 0.73     | 0.07,1.38   | 2.08 | 1.5      | 0.53,2.44   | 4.5   | 1.04     | 0.24,1.81   | 2.84 |
| Portable Stove                          | -0.09    | -0.49,0.3   | 0.91 | 0.14     | -0.43,0.72  | 1.15  | 0.16     | -0.31,0.63  | 1.18 |
| Mixed Ventilation                       | 0.12     | -0.19,0.42  | 1.13 | 0.26     | -0.18,0.7   | 1.29  | 0.36     | 0.01,0.71   | 1.43 |
| Unknown ventilation                     | -0.65    | -1.35,0.05  | 0.52 | -1.43    | -2.44,-0.4  | 0.24  | -1.17    | -1.99,-0.35 | 0.31 |
| <b>Room size (in m3)</b>                |          |             |      |          |             |       |          |             |      |
| <40m3                                   | Ref      |             | 1    | Ref      |             | 1     | Ref      |             | 1    |
| 40m3 to 49m3                            | -0.43    | -0.82,-0.05 | 0.65 | -0.53    | -1.09,0.03  | 0.59  | -0.5     | -0.96,-0.05 | 0.6  |
| 50m3 to 67m3                            | 0.01     | -0.41,0.44  | 1.01 | 0.34     | -0.26,0.95  | 1.41  | 0.11     | -0.38,0.61  | 1.12 |
| >67m3                                   | 0.06     | -0.36,0.47  | 1.06 | 0.5      | -0.11,1.1   | 1.65  | 0.14     | -0.36,0.63  | 1.15 |
| Room Size Unknown                       | -0.33    | -0.73,0.08  | 0.72 | -0.2     | -0.79,0.38  | 0.82  | -0.4     | -0.88,0.07  | 0.67 |
| <b>Season</b>                           |          |             |      |          |             |       |          |             |      |
| Autumn                                  | Ref      |             | 1    | Ref      |             | 1     | Ref      |             | 1    |
| Winter                                  | 0.09     | -0.22,0.4   | 1.1  | 0.22     | -0.25,0.7   | 1.25  | 0        | -0.38,0.37  | 1    |
| Spring/Summer                           | 0.02     | -0.25,0.29  | 1.02 | -0.48    | -0.89,-0.08 | 0.62  | -0.27    | -0.59,0.05  | 0.76 |
| <b>Variance explained</b>               |          |             |      |          |             |       |          |             |      |
| Between Subjects                        |          | 39          |      |          | 62          |       |          | 48          |      |
| Between Villages                        |          | 40          |      |          | 36          |       |          | 39          |      |

\*Reference value represents log transformed PAH value (in ng/m<sup>3</sup>) for the reference model entry (smokeless coals from Fuyuan, burnt in a ventilated stove in a "small" room)

GMR: = geometric mean ratio = GM(estimate)/GM(reference)=exp(Estimate)

BPE – Benzo[ghi]perylene, BbF – Benzo[b]fluoranthene, DBA – Dibenz[ah]anthracene, BkF – Benzo[k]fluoranthene

**Table S13 - Total PAH values and BaP<sub>eq</sub> values by fuel type and stove design**

|                       | N         | Total PAH    |               |            | BaP <sub>eq</sub> |               |             |
|-----------------------|-----------|--------------|---------------|------------|-------------------|---------------|-------------|
|                       |           | AM           | GM            | GSD        | AM                | GM            | GSD         |
| <b>Smoky Coal</b>     | <b>96</b> | <b>6600</b>  | <b>4500</b>   | <b>2.5</b> | <b>243.07</b>     | <b>134.63</b> | <b>2.98</b> |
| Ventilated Stove      | 53        | 4500         | 3800          | 1.9        | 172.88            | 121.21        | 2.37        |
| Unventilated Stove    | 4         | 16000        | 9900          | 2.9        | 701.53            | 455.93        | 2.78        |
| Portable Stove        | 12        | 7500         | 6100          | 2          | 159.22            | 112.34        | 2.38        |
| Firepit               | 4         | 28000        | 24000†        | 2          | 1065.05           | 907.3†        | 1.93        |
| Mixed Ventilation     | 19        | 6300         | 4200          | 3.2        | 263.98            | 148.72        | 3.3         |
| Unknown               | 4         | 1800         | 1500          | 2.1        | 44.91             | 25.42         | 3.06        |
| <b>Smokeless Coal</b> | <b>17</b> | <b>4400</b>  | <b>4100</b>   | <b>1.5</b> | <b>91.33</b>      | <b>66.01</b>  | <b>2.38</b> |
| Ventilated Stove      | 0         | -            | -             | -          | -                 | -             | -           |
| Unventilated Stove    | 9         | 4000         | 3700          | 1.6        | 73.73             | 57.04         | 2.25        |
| Portable Stove        | 7         | 5300         | 5000          | 1.4        | 123.39            | 91.36         | 2.46        |
| Firepit               | 0         | -            | -             | -          | -                 | -             | -           |
| Mixed Ventilation     | 1         | 2800         | 2800          | -          | 25.28             | 25.28         | -           |
| Unknown               | 0         | -            | -             | -          | -                 | -             | -           |
| <b>“Other” Coal</b>   | <b>14</b> | <b>12000</b> | <b>7500</b>   | <b>2.9</b> | <b>287.98</b>     | <b>167.19</b> | <b>3.4</b>  |
| Ventilated Stove      | 6         | 4400         | 3300          | 2.4        | 110.18            | 70.15         | 3.06        |
| Unventilated Stove    | 0         | -            | -             | -          | -                 | -             | -           |
| Portable Stove        | 7         | 18000        | 15000         | 2.1        | 429.69            | 315.1         | 2.56        |
| Firepit               | 0         | -            | -             | -          | -                 | -             | -           |
| Mixed Ventilation     | 1         | 8500         | 8500          | -          | 362.89            | 362.89        | -           |
| Unknown               | 0         | -            | -             | -          | -                 | -             | -           |
| <b>Wood</b>           | <b>7</b>  | <b>20000</b> | <b>11000</b>  | <b>3.7</b> | <b>222.36</b>     | <b>182.72</b> | <b>2.05</b> |
| Ventilated Stove      | 2         | 20000        | 19000         | 1.2        | 324.87            | 321.76        | 1.22        |
| Unventilated Stove    | 0         | -            | -             | -          | -                 | -             | -           |
| Portable Stove        | 3         | 30000        | 21000         | 2.9        | 228.44            | 193.13        | 1.98        |
| Firepit               | 2         | 3500         | 2500          | 3.5        | 110.72            | 95.48         | 2.2         |
| Mixed Ventilation     | 0         | -            | -             | -          | -                 | -             | -           |
| Unknown               | 0         | -            | -             | -          | -                 | -             | -           |
| <b>Plant</b>          | <b>3</b>  | <b>38000</b> | <b>31000*</b> | <b>2.1</b> | <b>331.58</b>     | <b>327.52</b> | <b>1.22</b> |
| Ventilated Stove      | 0         | -            | -             | -          | -                 | -             | -           |
| Unventilated Stove    | 1         | 72000        | 72000         | -          | 352.24            | 352.24        | -           |
| Portable Stove        | 0         | -            | -             | -          | -                 | -             | -           |
| Firepit               | 1         | 18000        | 18000         | -          | 262.47            | 262.47        | -           |
| Mixed Ventilation     | 1         | 24000        | 24000         | -          | 380.01            | 380.01        | -           |
| Unknown               | 0         | -            | -             | -          | -                 | -             | -           |
| <b>“Other” Fuel</b>   | <b>56</b> | <b>11000</b> | <b>6400</b>   | <b>3</b>   | <b>239.83</b>     | <b>115.28</b> | <b>3.23</b> |
| Ventilated Stove      | 9         | 6500         | 4600          | 2.4        | 123.68            | 94.92         | 2.49        |
| Unventilated Stove    | 11        | 30000        | 19000         | 3.4        | 706.9             | 378.71        | 3.96        |
| Portable Stove        | 5         | 6900         | 6100          | 1.7        | 151.96            | 95.69         | 2.87        |
| Firepit               | 0         | -            | -             | -          | -                 | -             | -           |
| Mixed Ventilation     | 28        | 6700         | 4900          | 2.6        | 127.55            | 85.01         | 2.62        |
| Unknown               | 3         | 6500         | 3500          | 4          | 69.97             | 61.75         | 1.92        |

\*- significant difference with smoky coal for same strata via Tukey HSD test

† - significant difference with ventilated stove for same PAH within fuel strata via Tukey HSD test

N – number of samples

Total PAH: Sum concentration of all 14 reported PAH measurements, restricted to samples where measurements for all 14 PAHs were available (n=193, personal only)

BaP toxic equivalent values (BaP<sub>eq</sub>) are calculated using toxic equivalencies as stated by Nisbet and Lagoy, 1992 (Nisbet, I.C.; Lagoy, P.K. Toxic equivalency factors (TEFs) for polycyclic aromatic hydrocarbons (PAHs). Regulatory Toxicology and Pharmacology, 1992, 16(3), 290-300). BaP<sub>eq</sub> was calculated as follows:

BaP<sub>eq</sub> = 5xDBA+1xBaP+0.1xBaA+0.1xBbF+0.1xIPY+0.01xBPE+0.01xCHR+0.001xANY+0.001xFLU+0.001xNAP+0.001xPHE+0.001xPYR

**Table S14 - Total PAH values and BaP<sub>eq</sub> values by smoky coal source**

|                |                    | N         | Total PAH   |             |            | BaP <sub>eq</sub> |              |            |
|----------------|--------------------|-----------|-------------|-------------|------------|-------------------|--------------|------------|
|                |                    |           | AM          | GM          | GSD        | AM                | GM           | GSD        |
| <b>Xuanwei</b> | <b>Coking Coal</b> | <b>61</b> | <b>5700</b> | <b>4200</b> | <b>2.4</b> | <b>246.3</b>      | <b>156.7</b> | <b>2.8</b> |
|                | Azhi               | 19        | 5200        | 4300        | 2          | 245.1             | 175.5        | 2.5        |
|                | Baoshan            | 7         | 9300        | 6200        | 2.7        | 375               | 194.8        | 4.1        |
|                | Laibin             | 19        | 4200        | 3300        | 2.6        | 205               | 145.9        | 2.5        |
|                | Tangtang           | 16        | 6500        | 4600        | 2.4        | 240.4             | 135.4        | 3.1        |
| <b>Fuyuan</b>  | <b>Overall</b>     | <b>30</b> | <b>8200</b> | <b>4600</b> | <b>2.7</b> | <b>232.9</b>      | <b>90.0*</b> | <b>3.4</b> |
|                | Coking             | 5         | 25000       | 12000†      | 4.8        | 896.4             | 411.2†       | 5.1        |
|                | Daping             | 2         | 2300        | 2300        | 1.2        | 96.5              | 82.3         | 2.3        |
|                | Haidan             | 3         | 40000       | 35000       | 1.9        | 1429.6            | 1201.6       | 2.2        |
|                | 1/3 Coking (Dahe)  | 2         | 3500        | 2800        | 2.6        | 25.9              | 23.2         | 1.9        |
|                | Gas Fat (Haidan)   | 21        | 4600        | 3700        | 2.1        | 96.2              | 68.8         | 2.2        |
|                | Meager Lean (Gumu) | 2         | 8900        | 6900        | 2.9        | 216.2             | 126.3        | 5          |

\*- significant difference between smoky coal subtypes from Fuyuan

† - significant variation within designated smoky coal subtype

N – number of samples

Total PAH: Sum concentration of all 14 reported PAH measurements, restricted to samples where measurements for all 14 PAHs were available (n=193, personal only)

BaP toxic equivalent values (BaP<sub>eq</sub>) are calculated using toxic equivalencies as stated by Nisbet and Lagoy, 1992 (Nisbet, I.C.; Lagoy, P.K. Toxic equivalency factors (TEFs) for polycyclic aromatic hydrocarbons (PAHs). Regulatory Toxicology and Pharmacology, 1992, 16(3), 290-300). BaP<sub>eq</sub> was calculated as follows:

$$\text{BaP}_{\text{eq}} = 5 \times \text{DBA} + 1 \times \text{BaP} + 0.1 \times \text{BaA} + 0.1 \times \text{BbF} + 0.1 \times \text{IPY} + 0.01 \times \text{BPE} + 0.01 \times \text{CHR} + 0.001 \times \text{ANY} + 0.001 \times \text{FLU} + 0.001 \times \text{NAP} + 0.001 \times \text{PHE} + 0.001 \times \text{PYR}$$

**Table S15 - Mixed effect models for total PAH values and BaP<sub>eq</sub> values**

| Reference/Background Value (Intercept)* |          | Total PAH  |      |          | BaP <sub>eq</sub> |      |
|-----------------------------------------|----------|------------|------|----------|-------------------|------|
|                                         |          | 7.82       |      |          | 3.83              |      |
| Fuel Type                               | Estimate | 95%CI      | GMR  | Estimate | 95%CI             | GMR  |
| Smokeless Coal (FY & XW)                | Ref      |            | 1    | Ref      |                   | 1    |
| Coking Coal from North XW               | 0.17     | -0.44,0.78 | 1.19 | 1.16     | 0.46,1.86         | 3.2  |
| Coking Coal from South XW               |          |            |      |          |                   |      |
| Coking Coal from FY                     | -0.08    | -1.04,0.89 | 0.92 | 1.01     | -0.18,2.17        | 2.75 |
| 1/3 Coking coal FY                      | 0.1      | -1.13,1.34 | 1.11 | -0.26    | -1.57,1.05        | 0.77 |
| Gas Fat coal FY                         | -0.03    | -0.79,0.7  | 0.97 | 0.2      | -0.68,1.03        | 1.22 |
| Meagre Lean coal FY                     | 0.72     | -0.51,1.95 | 2.06 | 1.24     | -0.16,2.61        | 3.44 |
| Multiple Coal Types                     | 0.53     | -0.12,1.19 | 1.7  | 1.04     | 0.31,1.76         | 2.82 |
| Multiple Fuel Types                     | 0.58     | -0.01,1.17 | 1.79 | 0.76     | 0.1,1.41          | 2.14 |
| Smoky Coal of uncertain type            | 0.6      | -0.21,1.4  | 1.81 | 1.13     | 0.17,2.09         | 3.08 |
| Plant Products                          | 0.4      | -0.92,1.74 | 1.5  | -0.04    | -1.54,1.47        | 0.96 |
| Wood                                    | -0.39    | -1.53,0.75 | 0.67 | -0.13    | -1.45,1.21        | 0.88 |
| <b>Stove Design</b>                     |          |            |      |          |                   |      |
| Ventilated Stove                        | Ref      |            | 1    | Ref      |                   | 1    |
| Unventilated Stove                      | 0.72     | 0.19,1.25  | 2.05 | 0.77     | 0.16,1.37         | 2.16 |
| Fire Pit                                | 1.48     | 0.64,2.3   | 4.38 | 1.54     | 0.52,2.55         | 4.69 |
| Portable Stove                          | 0.57     | 0.14,1     | 1.77 | 0.32     | -0.2,0.84         | 1.38 |
| Mixed Ventilation                       | -0.07    | -0.41,0.28 | 0.93 | -0.16    | -0.56,0.23        | 0.85 |
| Unknown ventilation                     | -0.64    | -1.3,0.02  | 0.53 | -0.85    | -1.63,-0.07       | 0.43 |
| <b>Room size (in m<sup>3</sup>)</b>     |          |            |      |          |                   |      |
| <40m <sup>3</sup>                       | Ref      |            | 1    | Ref      |                   | 1    |
| 40m <sup>3</sup> to 49m <sup>3</sup>    | -0.22    | -0.67,0.23 | 0.8  | -0.56    | -1.13,0.01        | 0.57 |
| 50m <sup>3</sup> to 67m <sup>3</sup>    | 0.55     | 0.07,1.01  | 1.74 | 0.3      | -0.27,0.87        | 1.35 |
| >67m <sup>3</sup>                       | 0.11     | -0.35,0.56 | 1.12 | -0.27    | -0.84,0.31        | 0.77 |
| Room Size Unknown                       | 0.05     | -0.42,0.5  | 1.05 | -0.06    | -0.63,0.5         | 0.94 |
| <b>Season</b>                           |          |            |      |          |                   |      |
| Autumn                                  | Ref      |            | 1    | Ref      |                   | 1    |
| Winter                                  | 0.51     | 0.15,0.86  | 1.66 | 0.38     | -0.02,0.75        | 1.46 |
| Spring/Summer                           | 0.17     | -0.12,0.45 | 1.18 | 0.25     | -0.05,0.56        | 1.29 |
| <b>Variance explained</b>               |          |            |      |          |                   |      |
| Between Subjects                        |          | 100        |      |          | 37                |      |
| Between Villages                        |          | 73         |      |          | 90                |      |

\*Reference value represents log transformed PAH value (in ng/m<sup>3</sup>) for the reference model entry (smokeless coals from Fuyuan, burnt in a ventilated stove in a "small" room)

GMR: = geometric mean ratio = GM(estimate)/GM(reference)=exp(Estimate)

BPE – Benzo[ghi]perylene, BbF – Benzo[b]fluoranthene, DBA – Dibenz[ah]anthracene, BkF – Benzo[k]fluoranthene

Total PAH: Sum concentration of all 14 reported PAH measurements, restricted to samples where measurements for all 14 PAHs were available (n=193, personal only)

BaP toxic equivalent values (BaP<sub>eq</sub>) are calculated using toxic equivalencies as stated by Nisbet and Lagoy, 1992 (Nisbet, I.C.; Lagoy, P.K. Toxic equivalency factors (TEFs) for polycyclic aromatic hydrocarbons (PAHs). Regulatory Toxicology and Pharmacology, 1992, 16(3), 290-300). BaP<sub>eq</sub> was calculated as follows:  
BaP<sub>eq</sub>= 5xDBA+1xBaP+0.1xBaA+0.1xBbF+0.1xIPY+0.01xBPE+0.01xCHR+0.001xANY+0.001xFLU+0.001xNAP+0.001xPHE+0.001xPYR
